# Supplementary material for: A Facile Ugi/Ullmann Cascade Reaction to Access Fused Indazolo-Quinoxaline Derivatives with Potent Anticancer Activity
Source: MDPI journal article supplement (doi:10.3390/molecules29020464), 2024-01-17

## checkCIF/PLATON report

Structure factors have been supplied for datablock(s) 1

THIS REPORT IS FOR GUIDANCE ONLY. IF USED AS PART OF A REVIEW PROCEDURE FOR PUBLICATION, IT SHOULD NOT REPLACE THE EXPERTISE OF AN EXPERIENCED CRYSTALLOGRAPHIC REFEREE.

No syntax errors found.      CIF dictionary      Interpreting this report

### Datablock: 1

---

|                        |                            |                      |             |
|------------------------|----------------------------|----------------------|-------------|
| Bond precision:        | C-C = 0.0057 Å             | Wavelength=0.71073   |             |
| Cell:                  | a=13.644 (12)              | b=25.64 (2)          | c=29.54 (3) |
|                        | alpha=90                   | beta=90              | gamma=90    |
| Temperature:           | 296 K                      |                      |             |
|                        | Calculated                 | Reported             |             |
| Volume                 | 10334 (16)                 | 10334 (16)           |             |
| Space group            | P b c n                    | P b c n              |             |
| Hall group             | -P 2n 2ab                  | -P 2n 2ab            |             |
| Moiety formula         | 4 (C28 H25 Cl N4 O2), H2 O | ?                    |             |
| Sum formula            | C112 H102 Cl4 N16 O9       | C56 H51 Cl2 N8 O4.50 |             |
| Mr                     | 1957.90                    | 978.95               |             |
| Dx, g cm <sup>-3</sup> | 1.258                      | 1.258                |             |
| Z                      | 4                          | 8                    |             |
| Mu (mm <sup>-1</sup> ) | 0.181                      | 0.181                |             |
| F000                   | 4104.0                     | 4104.0               |             |
| F000'                  | 4107.89                    |                      |             |
| h, k, lmax             | 16, 30, 35                 | 16, 30, 35           |             |
| Nref                   | 9110                       | 9086                 |             |
| Tmin, Tmax             | 0.957, 0.971               |                      |             |
| Tmin'                  | 0.954                      |                      |             |

Correction method= Not given

Data completeness= 0.997      Theta(max)= 24.999

R(reflections)= 0.0572 ( 3732)

wR2(reflections)=  
0.1455 ( 9086)

S = 0.850

Npar= 640

---

The following ALERTS were generated. Each ALERT has the format

**test-name\_ALERT\_alert-type\_alert-level.**

Click on the hyperlinks for more details of the test.

---

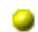

### Alert level C

RINTA01\_ALERT\_3\_C The value of Rint is greater than 0.12  
Rint given 0.153

|                   |                                                  |         |           |
|-------------------|--------------------------------------------------|---------|-----------|
| PLAT026_ALERT_3_C | Ratio Observed / Unique Reflections (too) Low .. | 41%     | Check     |
| PLAT148_ALERT_3_C | s.u. on the c - Axis is (Too) Large ....         | 0.030   | Ang.      |
| PLAT220_ALERT_2_C | NonSolvent Resd 1 C Ueq(max)/Ueq(min) Range      | 3.6     | Ratio     |
| PLAT234_ALERT_4_C | Large Hirshfeld Difference C3 --C4               | 0.17    | Ang.      |
| PLAT241_ALERT_2_C | High 'MainMol' Ueq as Compared to Neighbors of   | C4      | Check     |
| PLAT242_ALERT_2_C | Low 'MainMol' Ueq as Compared to Neighbors of    | C6      | Check     |
| PLAT242_ALERT_2_C | Low 'MainMol' Ueq as Compared to Neighbors of    | C12     | Check     |
| PLAT242_ALERT_2_C | Low 'MainMol' Ueq as Compared to Neighbors of    | C40     | Check     |
| PLAT260_ALERT_2_C | Large Average Ueq of Residue Including O5        | 0.269   | Check     |
| PLAT340_ALERT_3_C | Low Bond Precision on C-C Bonds .....            | 0.00566 | Ang.      |
| PLAT601_ALERT_2_C | Unit Cell Contains Solvent Accessible VOIDS of . | 42      | Ang**3    |
| PLAT906_ALERT_3_C | Large K Value in the Analysis of Variance .....  | 31.569  | Check     |
| PLAT906_ALERT_3_C | Large K Value in the Analysis of Variance .....  | 5.275   | Check     |
| PLAT910_ALERT_3_C | Missing # of FCF Reflection(s) Below Theta(Min). | 9       | Note      |
| PLAT911_ALERT_3_C | Missing FCF Refl Between Thmin & STh/L=          | 0.595   | 17 Report |

---

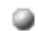

### Alert level G

|                   |                                                  |        |        |
|-------------------|--------------------------------------------------|--------|--------|
| PLAT003_ALERT_2_G | Number of Uiso or Uij Restrained non-H Atoms ... | 2      | Report |
| PLAT007_ALERT_5_G | Number of Unrefined Donor-H Atoms .....          | 4      | Report |
| PLAT020_ALERT_3_G | The Value of Rint is Greater Than 0.12 .....     | 0.153  | Report |
| PLAT045_ALERT_1_G | Calculated and Reported Z Differ by a Factor ... | 0.500  | Check  |
| PLAT177_ALERT_4_G | The CIF-Embedded .res File Contains DELU Records | 1      | Report |
| PLAT192_ALERT_3_G | A Non-default DELU Restraint Value for First Par | 0.0010 | Report |
| PLAT192_ALERT_3_G | A Non-default DELU Restraint Value for SecondPar | 0.0020 | Report |
| PLAT300_ALERT_4_G | Atom Site Occupancy of H5C Constrained at        | 0.5    | Check  |
| PLAT300_ALERT_4_G | Atom Site Occupancy of H5D Constrained at        | 0.5    | Check  |
| PLAT793_ALERT_4_G | Model has Chirality at C8 (Centro SPGR)          | R      | Verify |
| PLAT793_ALERT_4_G | Model has Chirality at C36 (Centro SPGR)         | S      | Verify |
| PLAT860_ALERT_3_G | Number of Least-Squares Restraints .....         | 1      | Note   |
| PLAT883_ALERT_1_G | No Info/Value for _atom_sites_solution_primary . | Please | Do !   |
| PLAT913_ALERT_3_G | Missing # of Very Strong Reflections in FCF .... | 3      | Note   |
| PLAT933_ALERT_2_G | Number of HKL-OMIT Records in Embedded .res File | 22     | Note   |
| PLAT961_ALERT_5_G | Dataset Contains no Negative Intensities .....   | Please | Check  |
| PLAT967_ALERT_5_G | Note: Two-Theta Cutoff Value in Embedded .res .. | 50.0   | Degree |
| PLAT978_ALERT_2_G | Number C-C Bonds with Positive Residual Density. | 4      | Info   |

---

- 0 **ALERT level A** = Most likely a serious problem - resolve or explain  
0 **ALERT level B** = A potentially serious problem, consider carefully  
16 **ALERT level C** = Check. Ensure it is not caused by an omission or oversight  
18 **ALERT level G** = General information/check it is not something unexpected
- 2 ALERT type 1 CIF construction/syntax error, inconsistent or missing data  
10 ALERT type 2 Indicator that the structure model may be wrong or deficient  
13 ALERT type 3 Indicator that the structure quality may be low  
6 ALERT type 4 Improvement, methodology, query or suggestion  
3 ALERT type 5 Informative message, check

---

---

It is advisable to attempt to resolve as many as possible of the alerts in all categories. Often the minor alerts point to easily fixed oversights, errors and omissions in your CIF or refinement strategy, so attention to these fine details can be worthwhile. In order to resolve some of the more serious problems it may be necessary to carry out additional measurements or structure refinements. However, the purpose of your study may justify the reported deviations and the more serious of these should normally be commented upon in the discussion or experimental section of a paper or in the "special\_details" fields of the CIF. checkCIF was carefully designed to identify outliers and unusual parameters, but every test has its limitations and alerts that are not important in a particular case may appear. Conversely, the absence of alerts does not guarantee there are no aspects of the results needing attention. It is up to the individual to critically assess their own results and, if necessary, seek expert advice.

### **Publication of your CIF in IUCr journals**

A basic structural check has been run on your CIF. These basic checks will be run on all CIFs submitted for publication in IUCr journals (*Acta Crystallographica*, *Journal of Applied Crystallography*, *Journal of Synchrotron Radiation*); however, if you intend to submit to *Acta Crystallographica Section C* or *E* or *IUCrData*, you should make sure that full publication checks are run on the final version of your CIF prior to submission.

### **Publication of your CIF in other journals**

Please refer to the *Notes for Authors* of the relevant journal for any special instructions relating to CIF submission.

Datablock 1 - ellipsoid plot

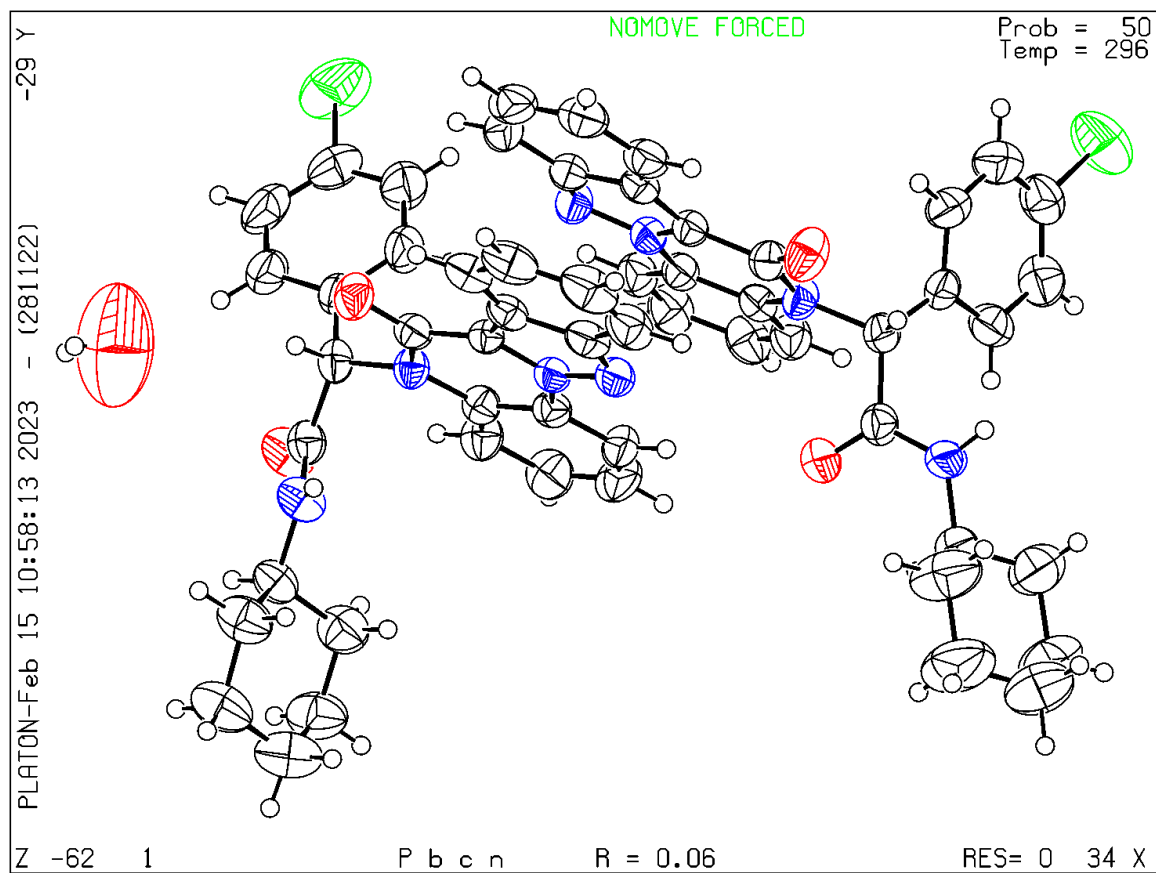

Supplement: s1 [file s1]
