# Supplementary material for: A Facile Ugi/Ullmann Cascade Reaction to Access Fused Indazolo-Quinoxaline Derivatives with Potent Anticancer Activity
Source: MDPI journal article supplement (doi:10.3390/molecules29020464), 2024-01-17

## Supporting Information

# **A Facile Ugi/Ullmann Cascade Reaction to Access Fused Indazolo-Quinoxaline Derivatives with Potent Anticancer Activity**

Yong Li <sup>1,2</sup>, Liu-Jun He<sup>1</sup>, Hong-Xia Qin<sup>1\*</sup>, Yao Liu<sup>1</sup>, Bin-Xin Yang<sup>1</sup>, Zhi-Gang Xu<sup>1</sup>, Dong-Lin Yang<sup>1\*</sup>

<sup>1</sup> College of Pharmacy, National & Local Joint Engineering Research Center of Targeted and Innovative Therapeutics, Chongqing Key Laboratory of Kinase Modulators as Innovative Medicine, Chongqing University of Arts and Sciences, Chongqing 402160, China

<sup>2</sup> School of Chemistry and Chemical Engineering, Southwest University, Chongqing 400715, China

Correspondence: 17320489614@163.com (H.-X.Q.)  
dlyang@cqwu.edu.cn (D.-L.Y.)

### **Table of Contents**

|                                                                                 |    |
|---------------------------------------------------------------------------------|----|
| 1. X-Ray crystal data for compound <b>6k</b> .....                              | S2 |
| 2. <sup>1</sup> H, and <sup>13</sup> C NMR spectra for compounds <b>6</b> ..... | S3 |

## 1. X-Ray crystal data for compounds **6k**

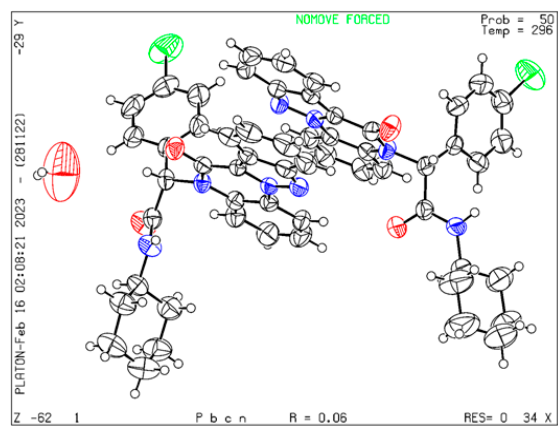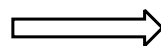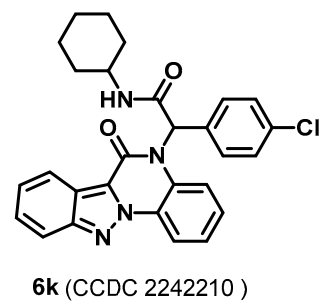

2.  $^1\text{H}$  and  $^{13}\text{C}$  NMR spectra for compounds **6**

$^1\text{H}$  NMR spectrum of **6a** (400 MHz,  $\text{CDCl}_3$ )

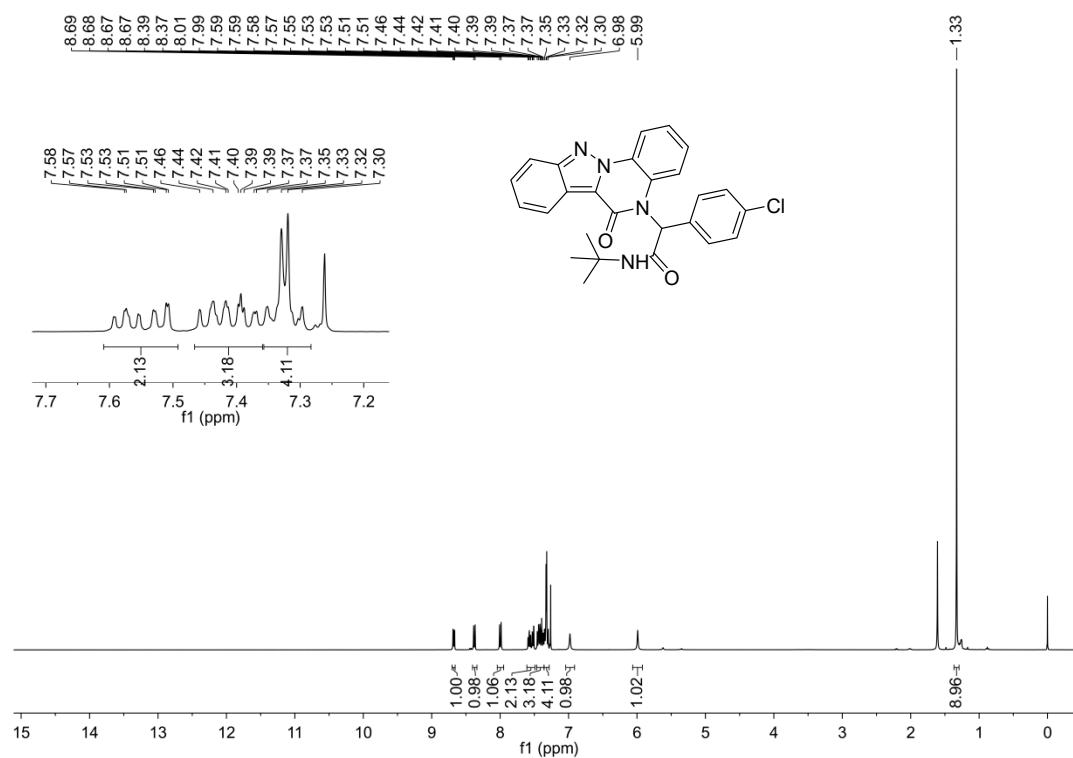

$^{13}\text{C}$  NMR spectrum of **6a** (101 MHz,  $\text{CDCl}_3$ )

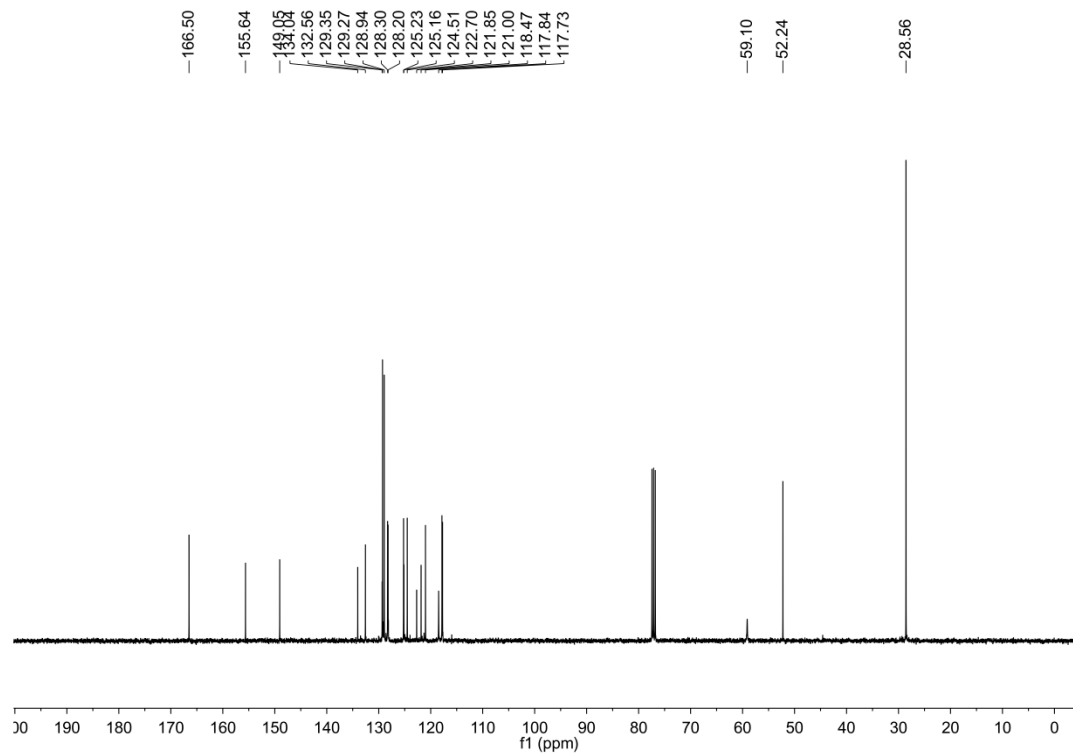

$^1\text{H}$  NMR spectrum of **6b** (400 MHz,  $\text{CDCl}_3$ )

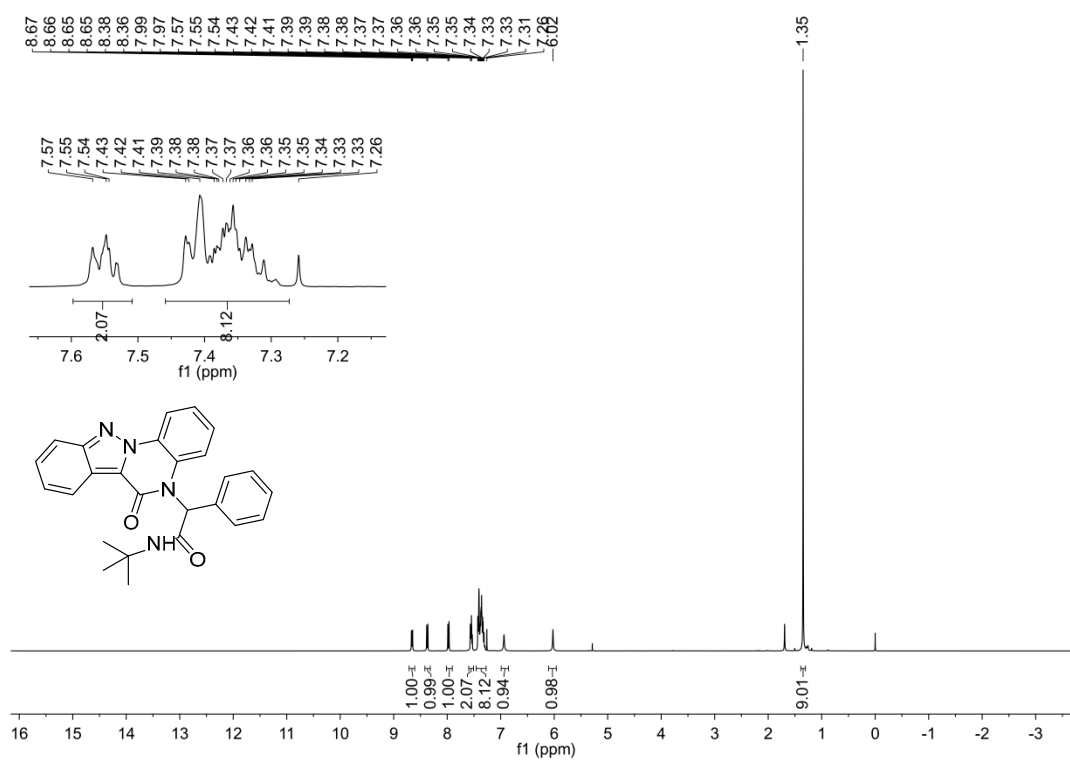

$^{13}\text{C}$  NMR spectrum of **6b** (101 MHz,  $\text{CDCl}_3$ )

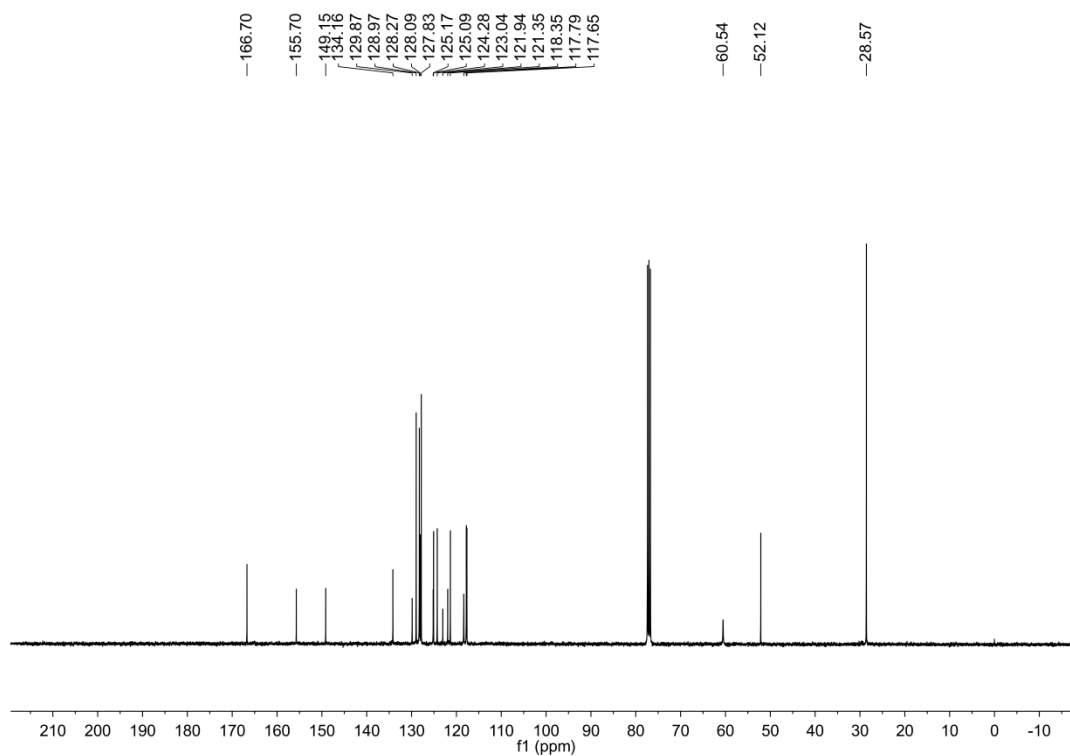

<sup>1</sup>H NMR spectrum of **6c** (400 MHz, CDCl<sub>3</sub>)

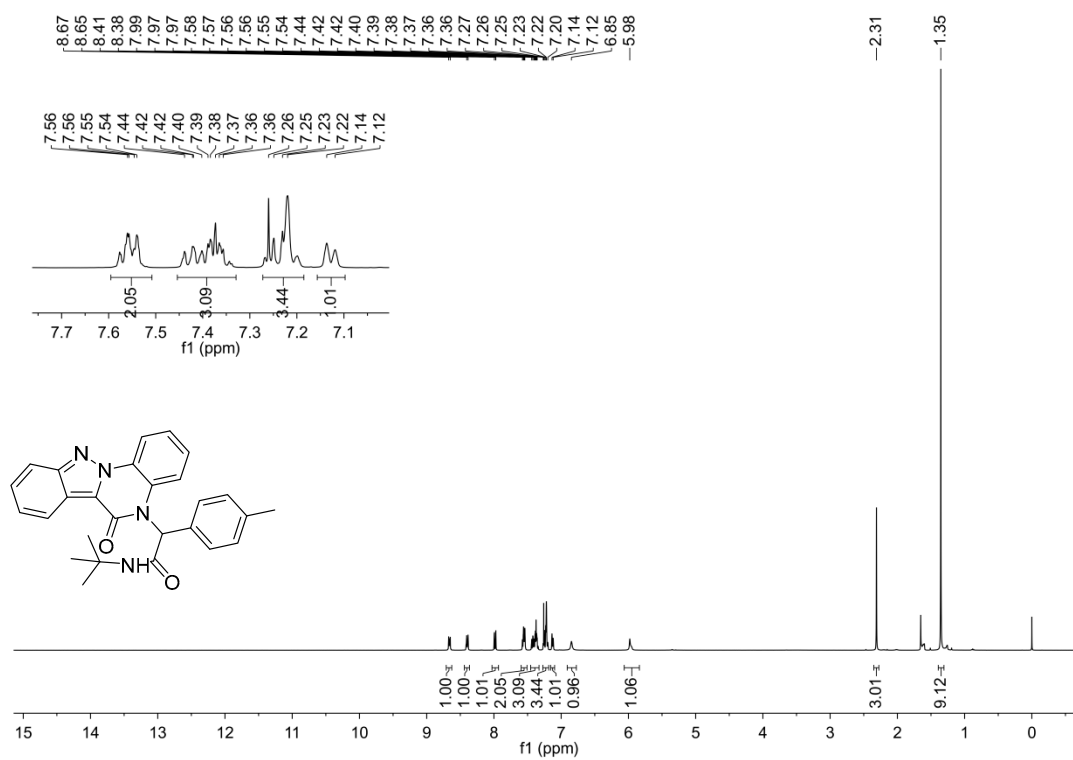

<sup>13</sup>C NMR spectrum of **6c** (101 MHz, CDCl<sub>3</sub>)

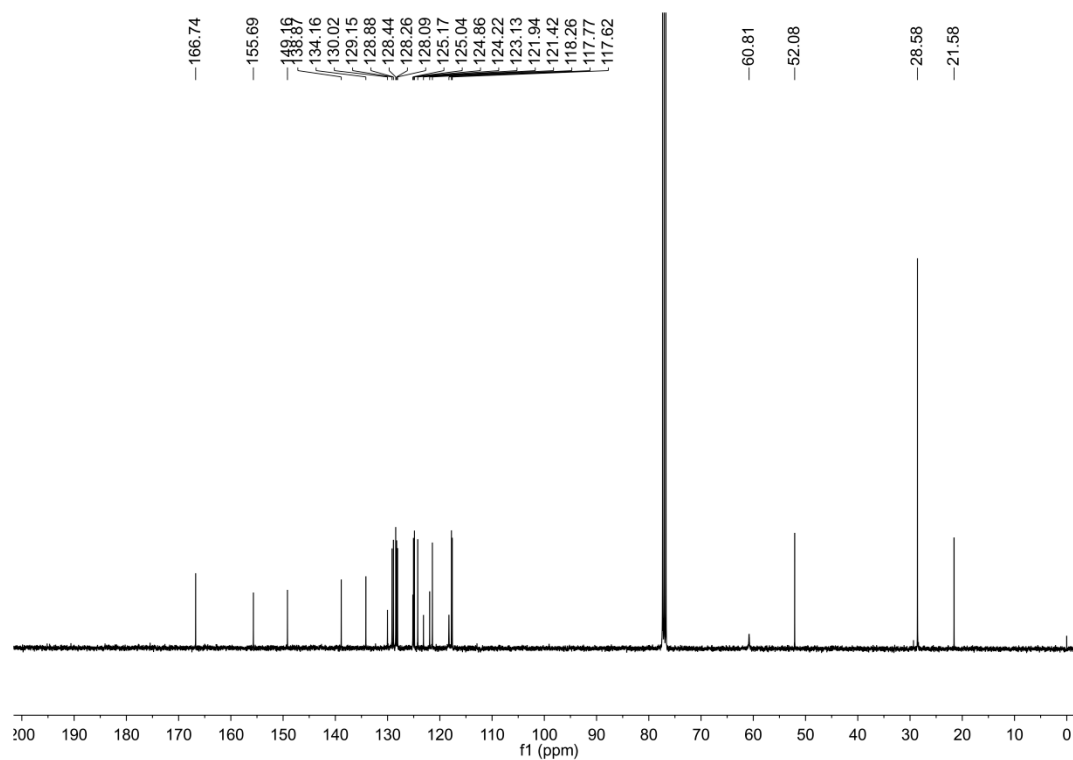

$^1\text{H}$  NMR spectrum of **6d** (400 MHz,  $\text{CDCl}_3$ )

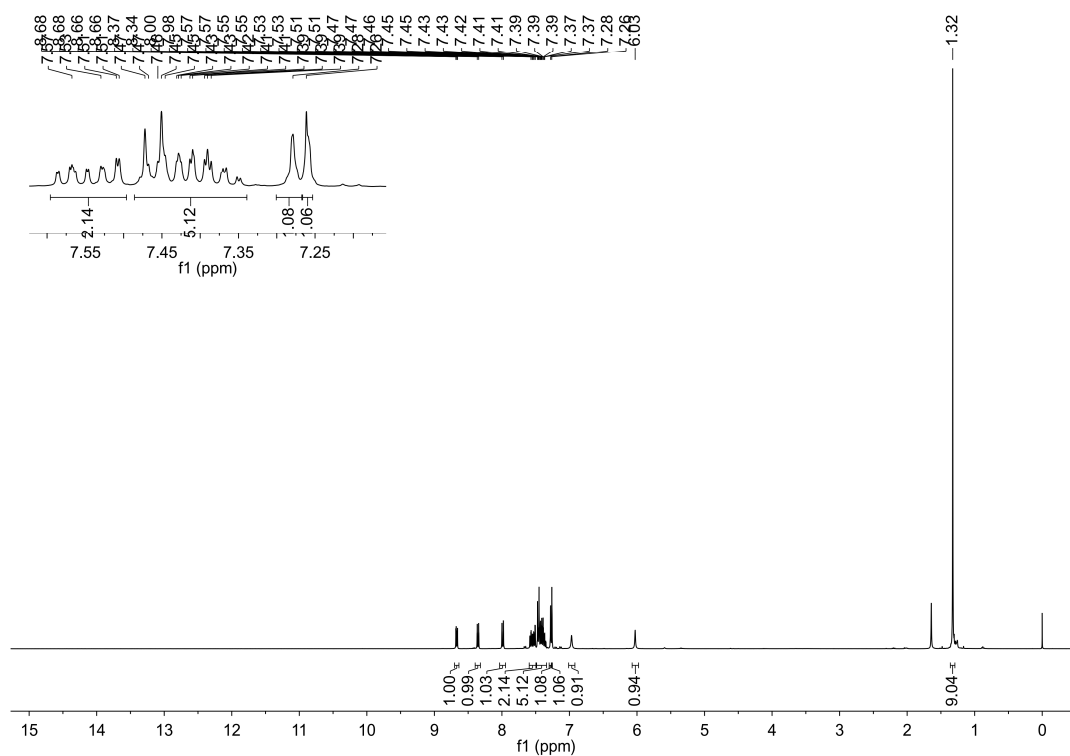

$^{13}\text{C}$  NMR spectrum of **6d** (101 MHz,  $\text{CDCl}_3$ )

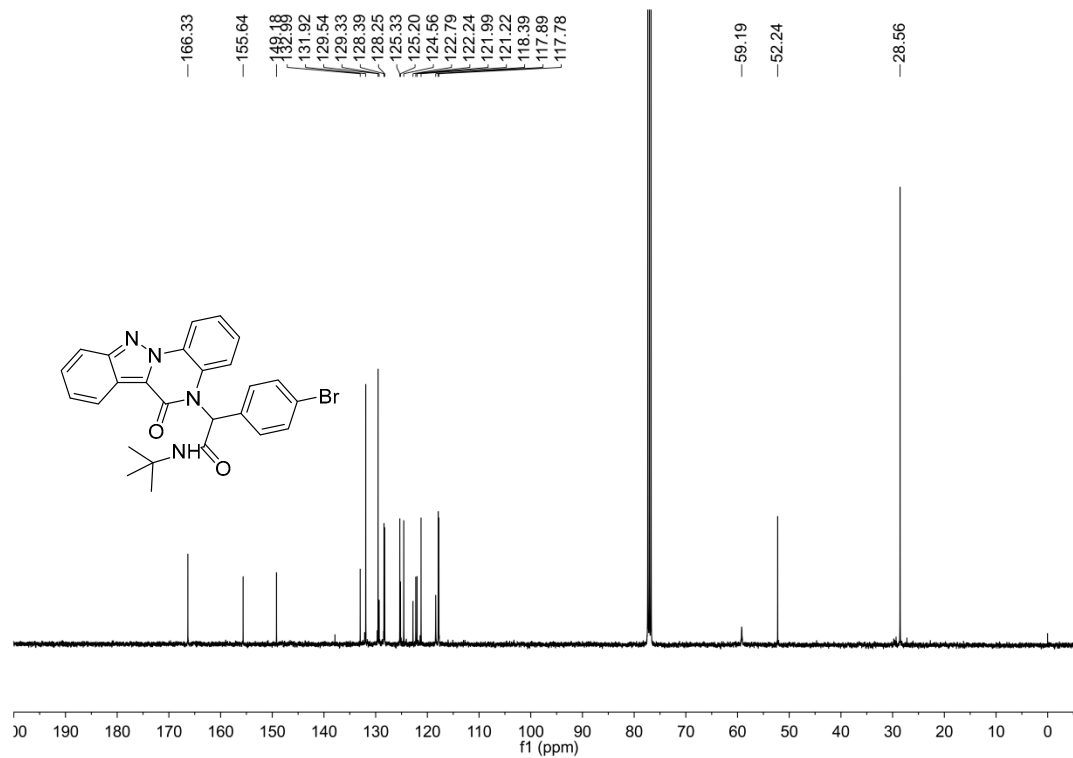

<sup>1</sup>H NMR spectrum of **6e** (400 MHz, CDCl<sub>3</sub>)

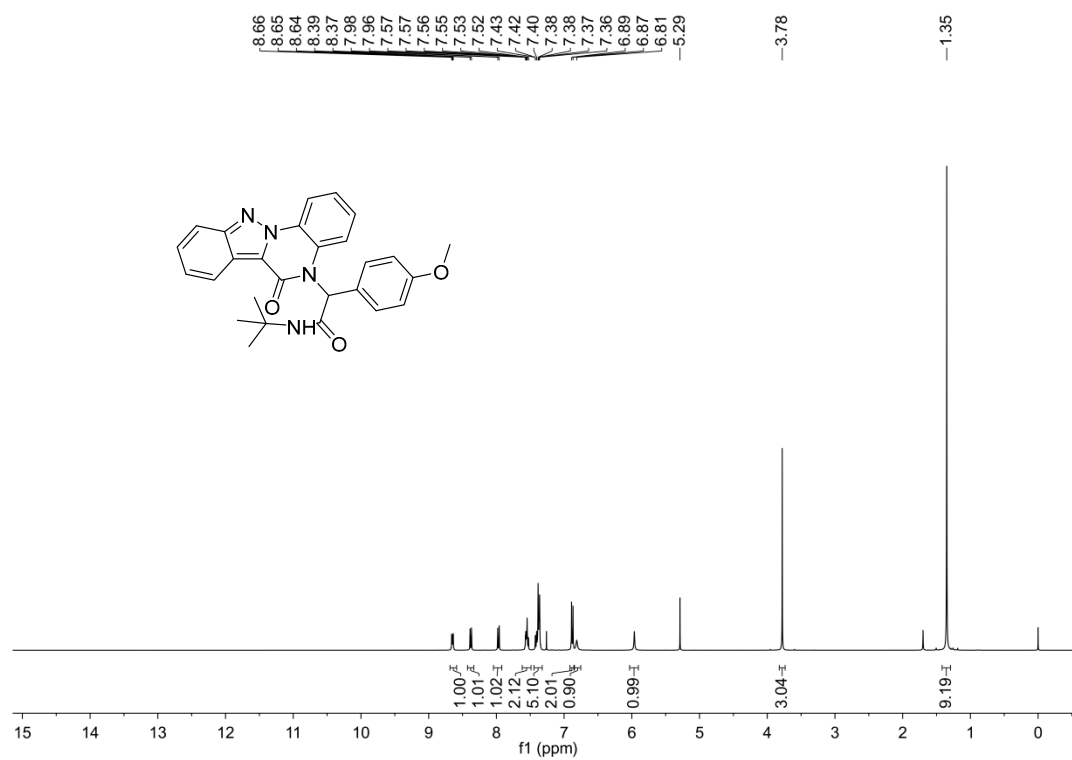

<sup>13</sup>C NMR spectrum of **6e** (101 MHz, CDCl<sub>3</sub>)

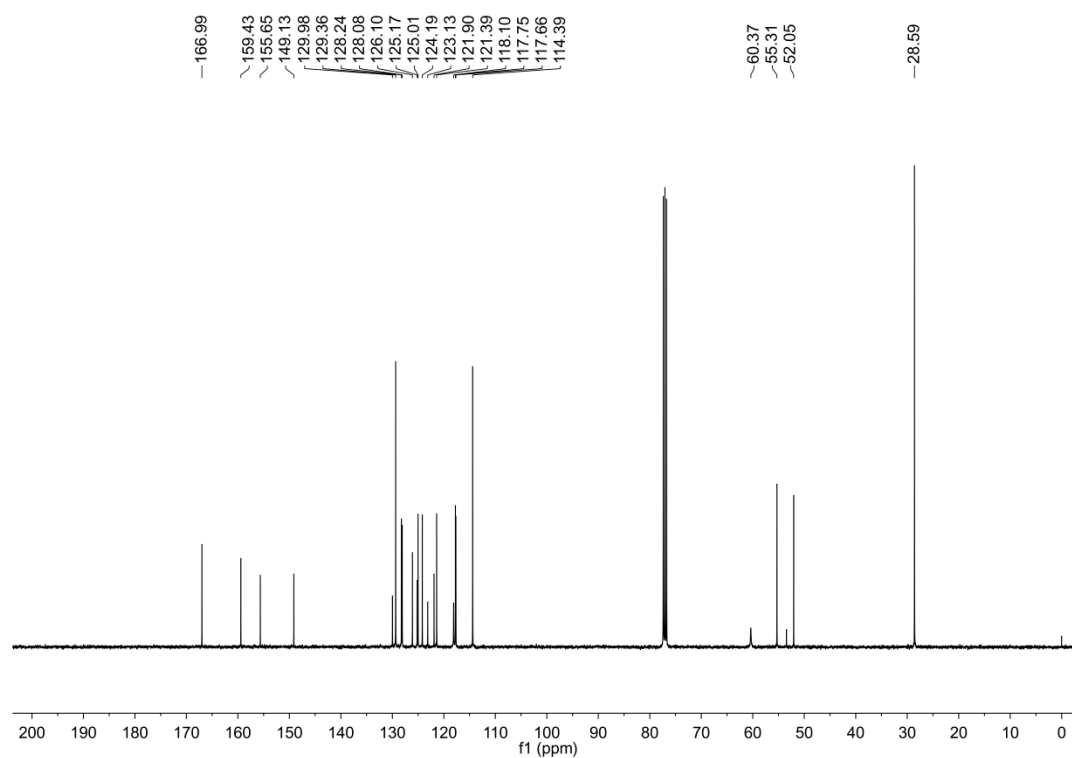

<sup>1</sup>H NMR spectrum of **6f** (101 MHz, CDCl<sub>3</sub>)

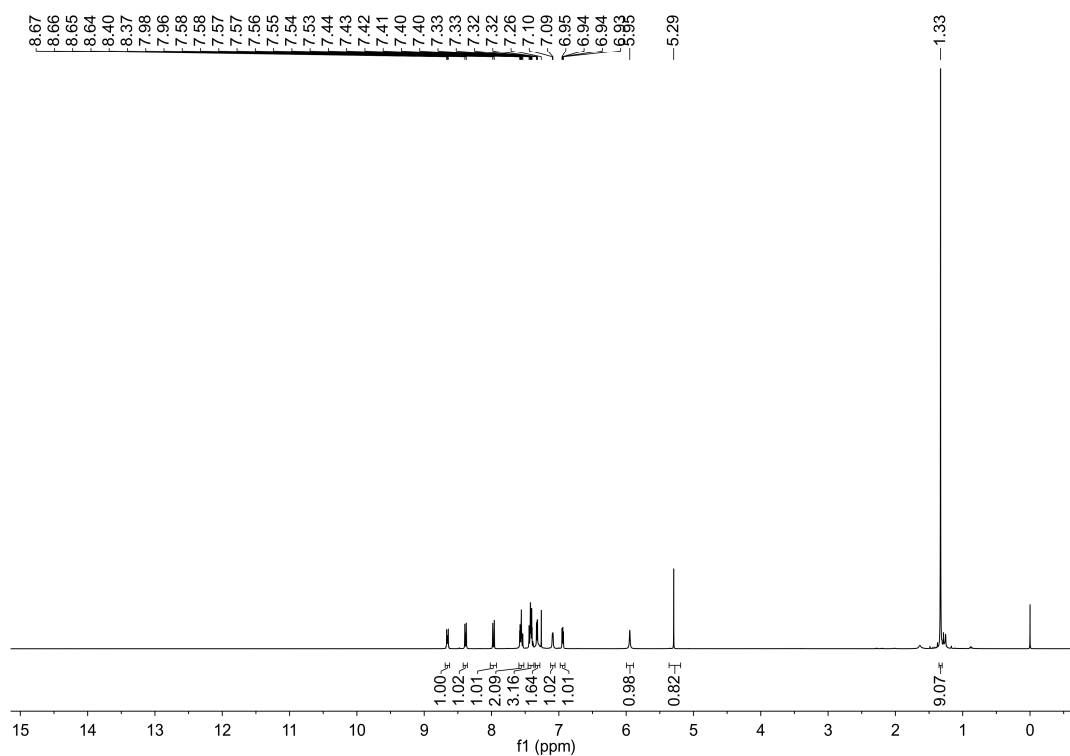

<sup>13</sup>C NMR spectrum of **6f** (101 MHz, CDCl<sub>3</sub>)

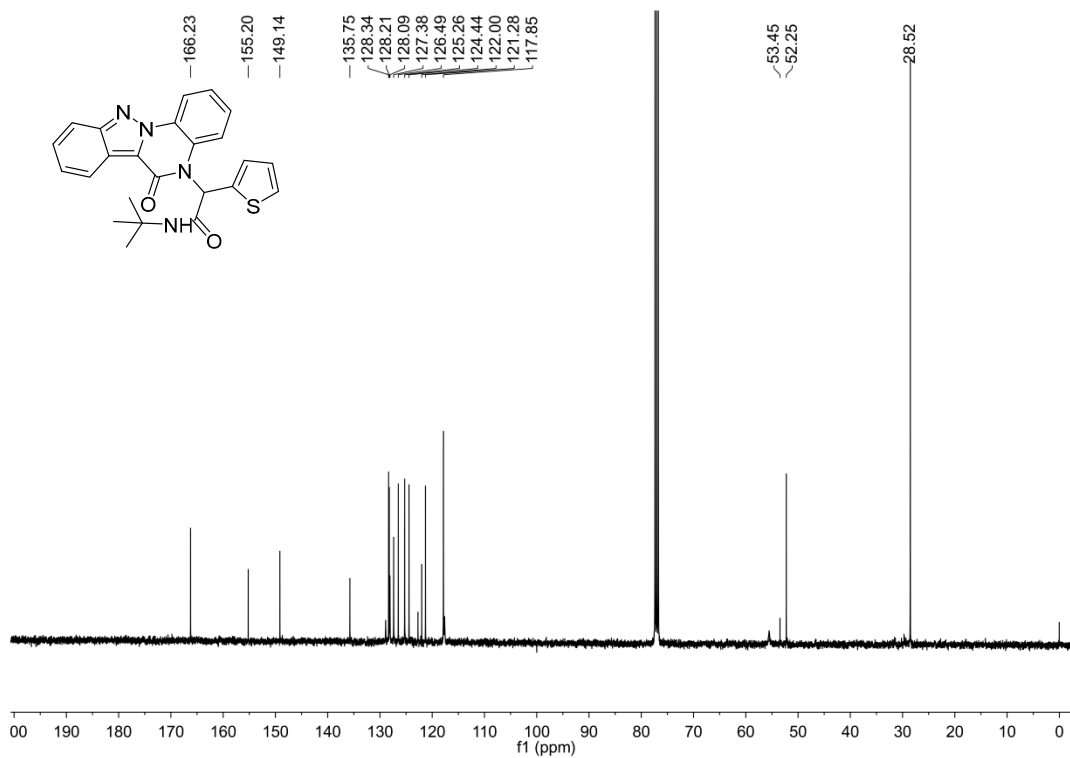



<sup>1</sup>H NMR spectrum of **6g** (400 MHz, CDCl<sub>3</sub>)

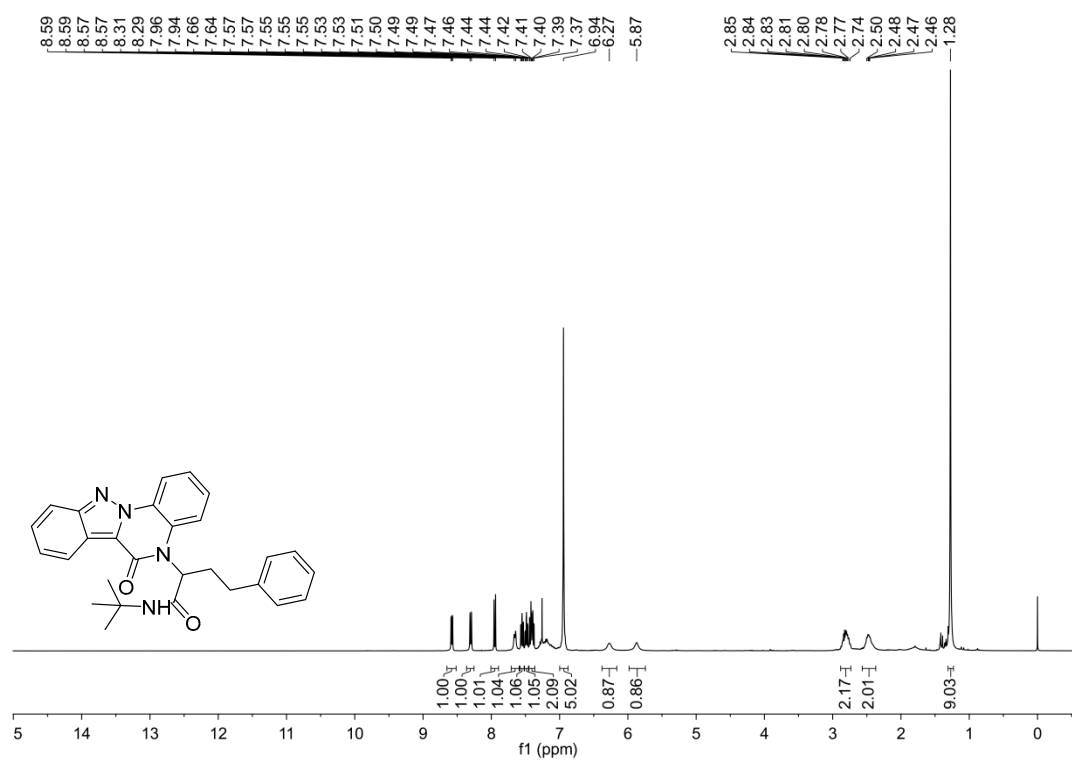

<sup>13</sup>C NMR spectrum of **6g** (101 MHz, CDCl<sub>3</sub>)

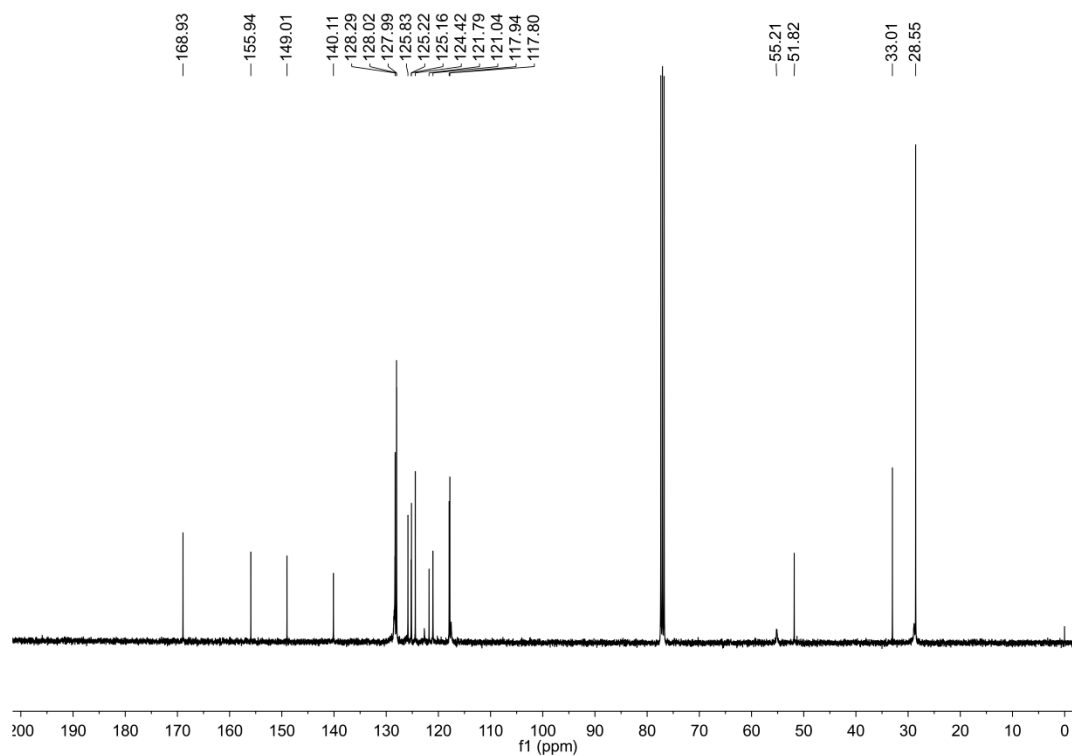

<sup>1</sup>H NMR spectrum of **6h** (400 MHz, CDCl<sub>3</sub>)

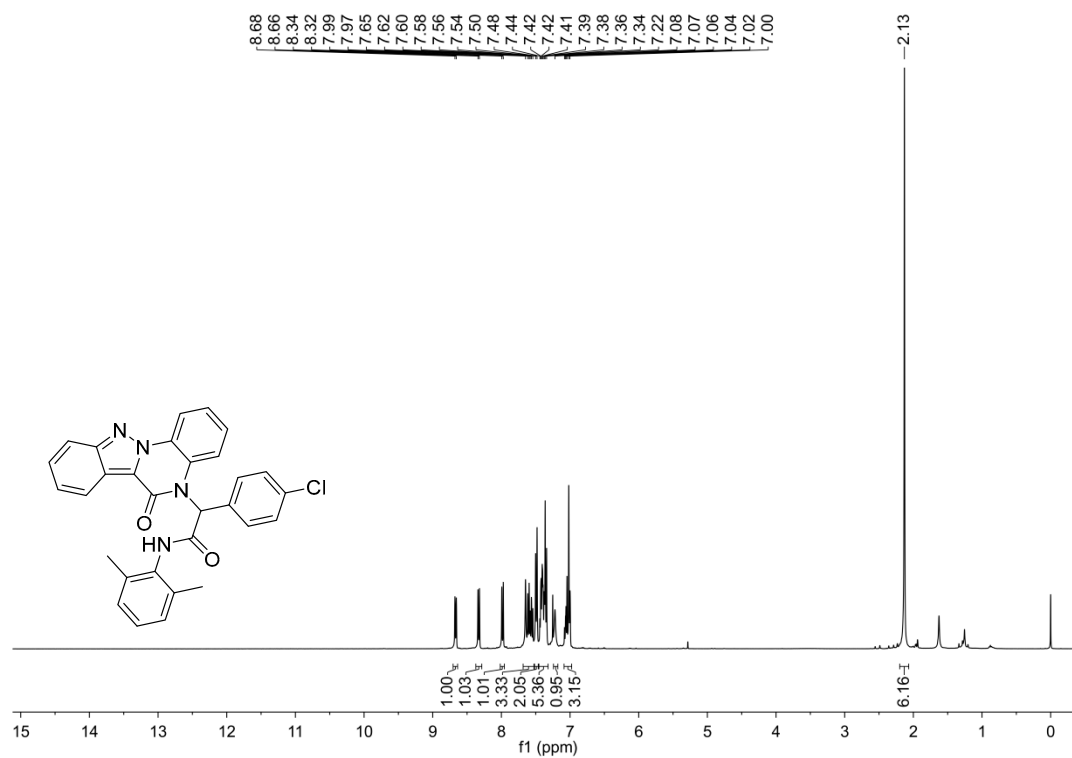

<sup>13</sup>C NMR spectrum of **6h** (101 MHz, CDCl<sub>3</sub>)

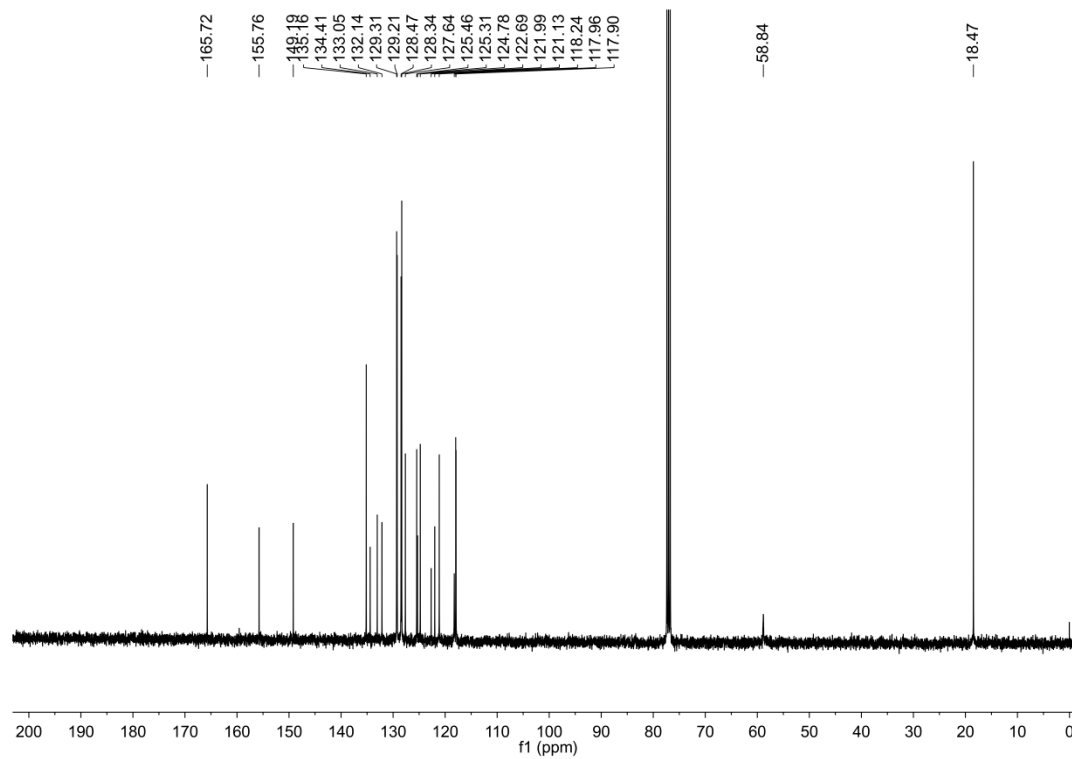

<sup>1</sup>H NMR spectrum of **6i** (400 MHz, CDCl<sub>3</sub>)

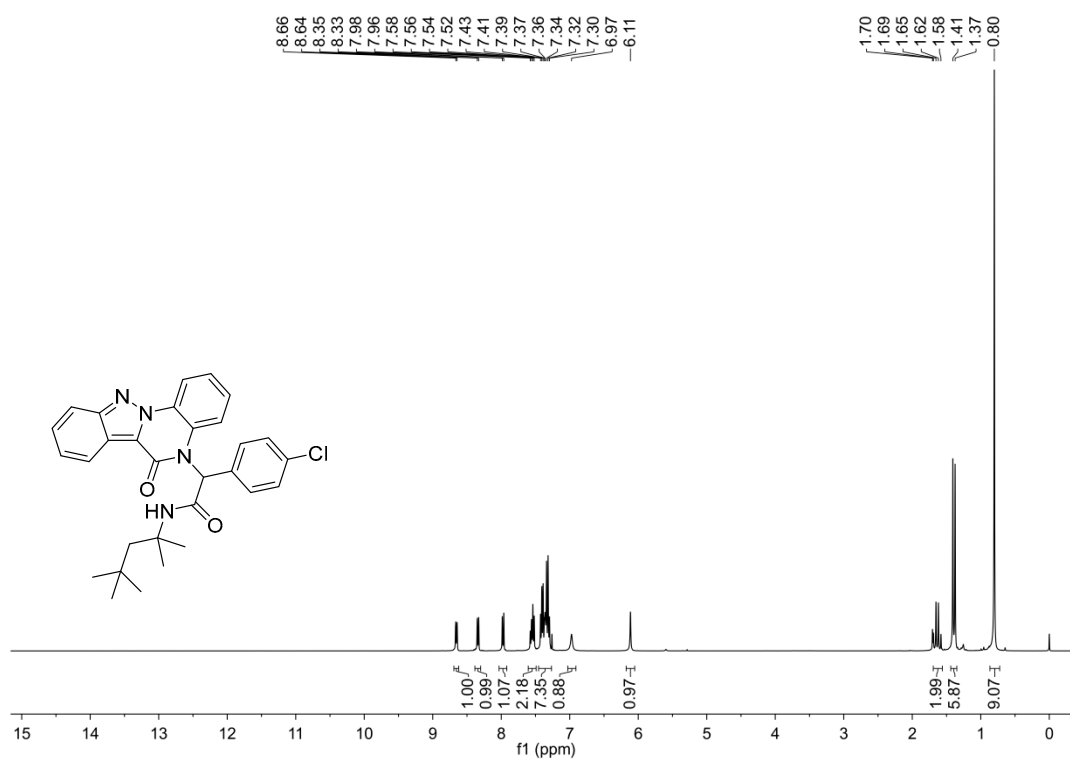

<sup>13</sup>C NMR spectrum of **6i** (101 MHz, CDCl<sub>3</sub>)

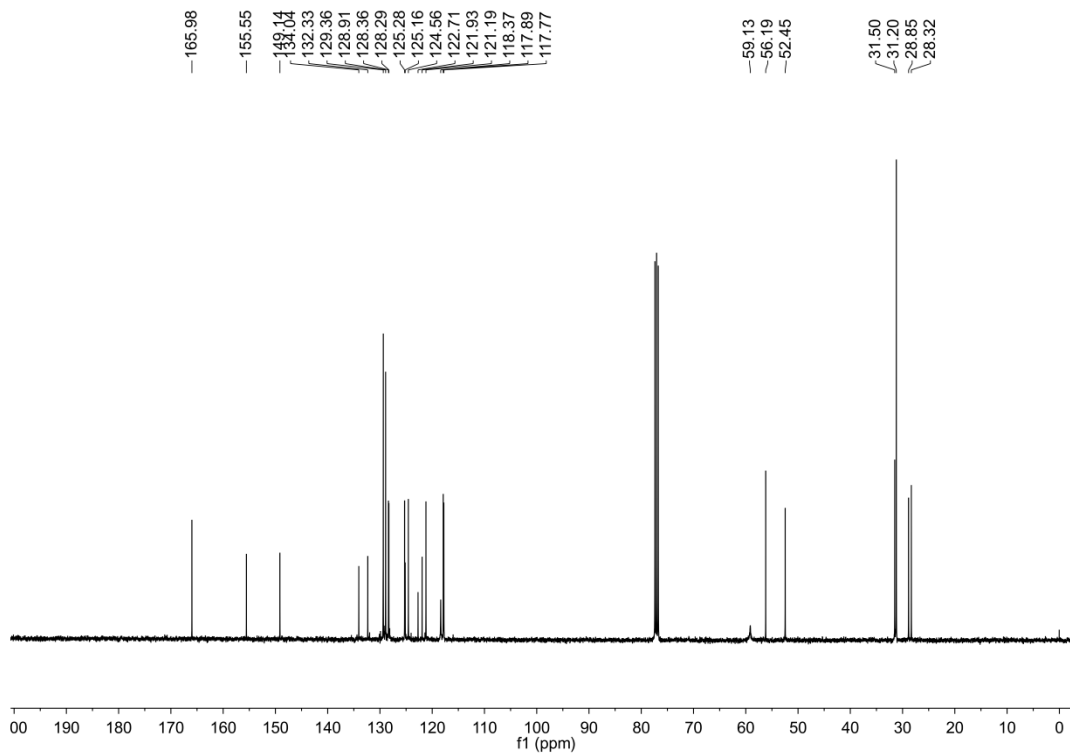

$^1\text{H}$  NMR spectrum of **6j** (400 MHz,  $\text{CDCl}_3$ )

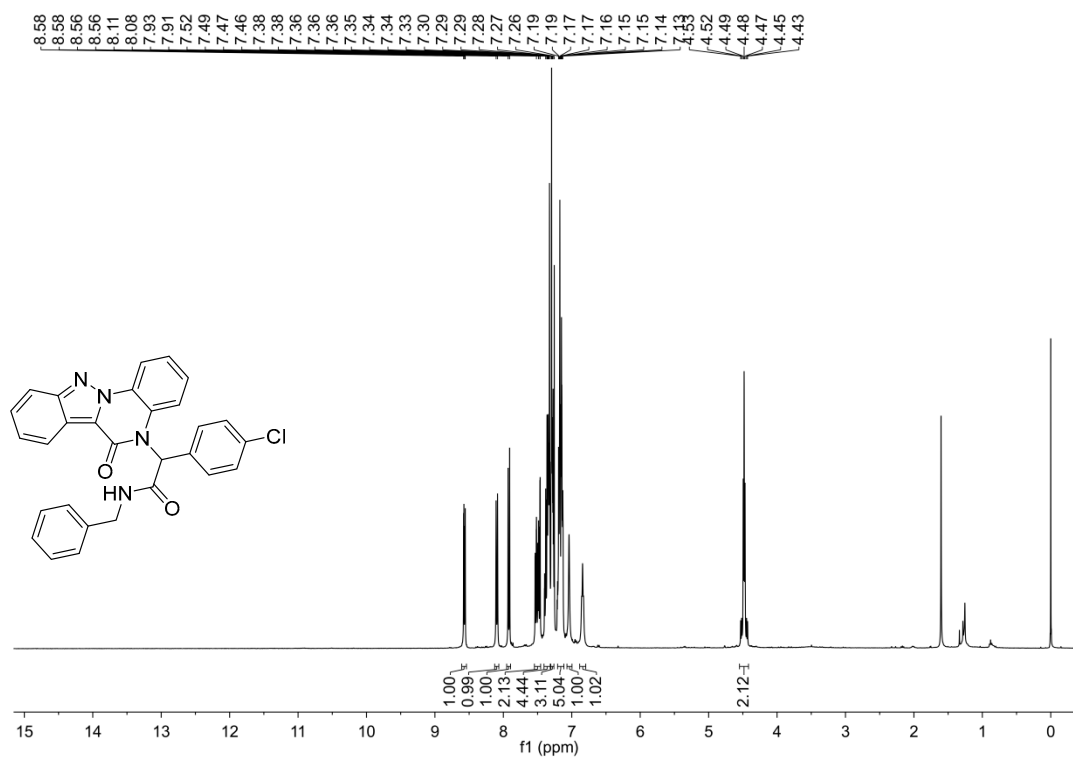

$^{13}\text{C}$  NMR spectrum of **6j** (101 MHz,  $\text{CDCl}_3$ )

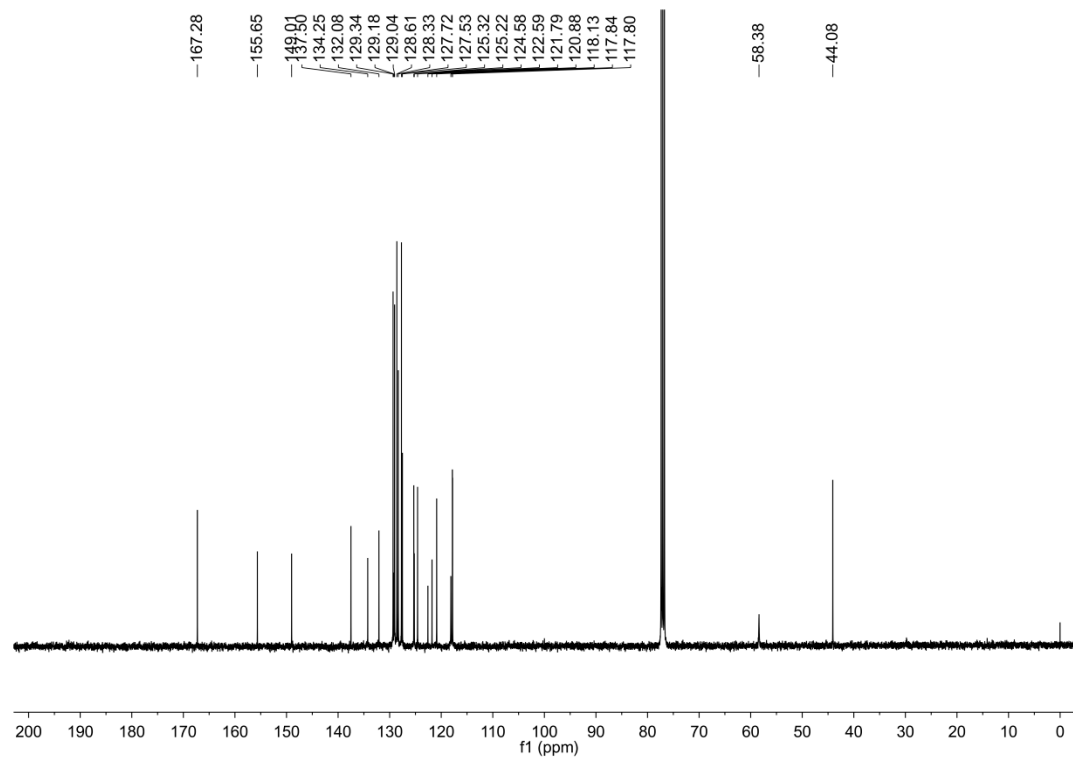

<sup>1</sup>H NMR spectrum of **6k** (400 MHz, CDCl<sub>3</sub>)

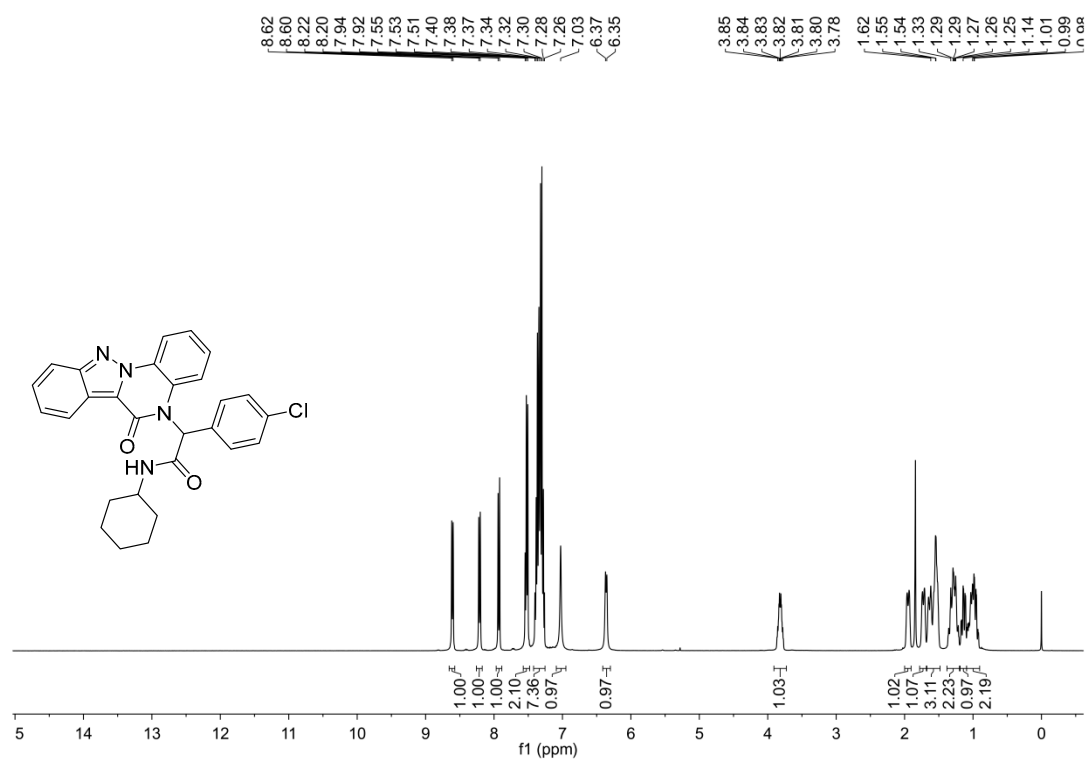

<sup>13</sup>C NMR spectrum of **6k** (101 MHz, CDCl<sub>3</sub>)

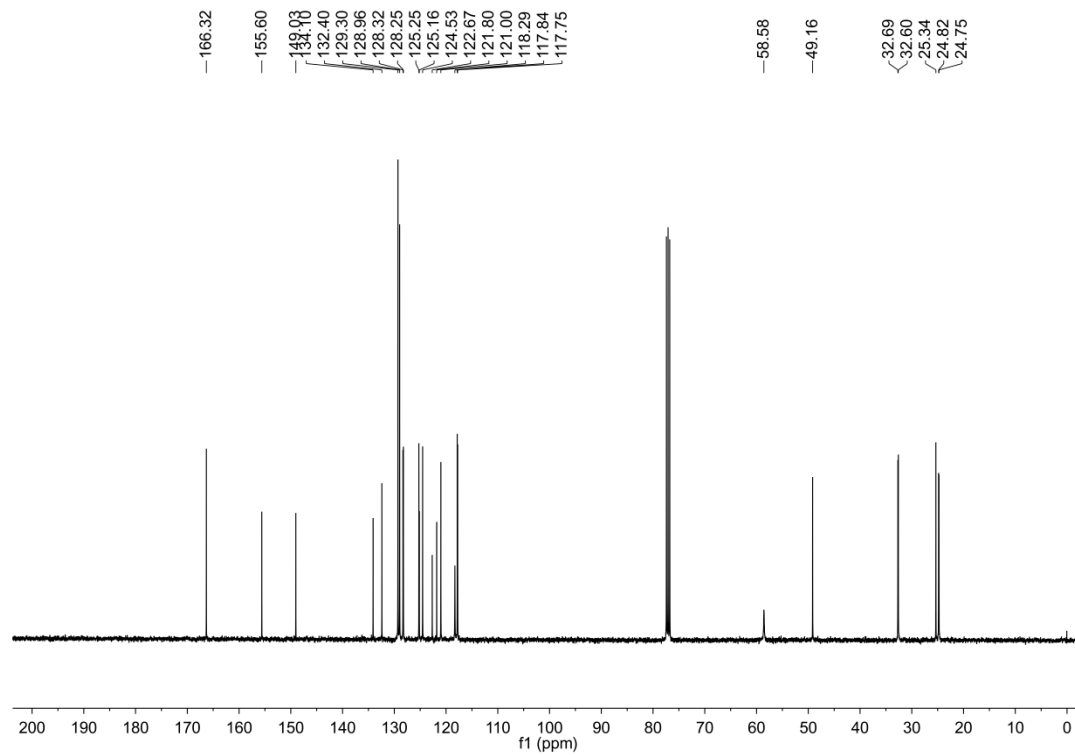

$^1\text{H}$  NMR spectrum of **6l** (400 MHz,  $\text{CDCl}_3$ )

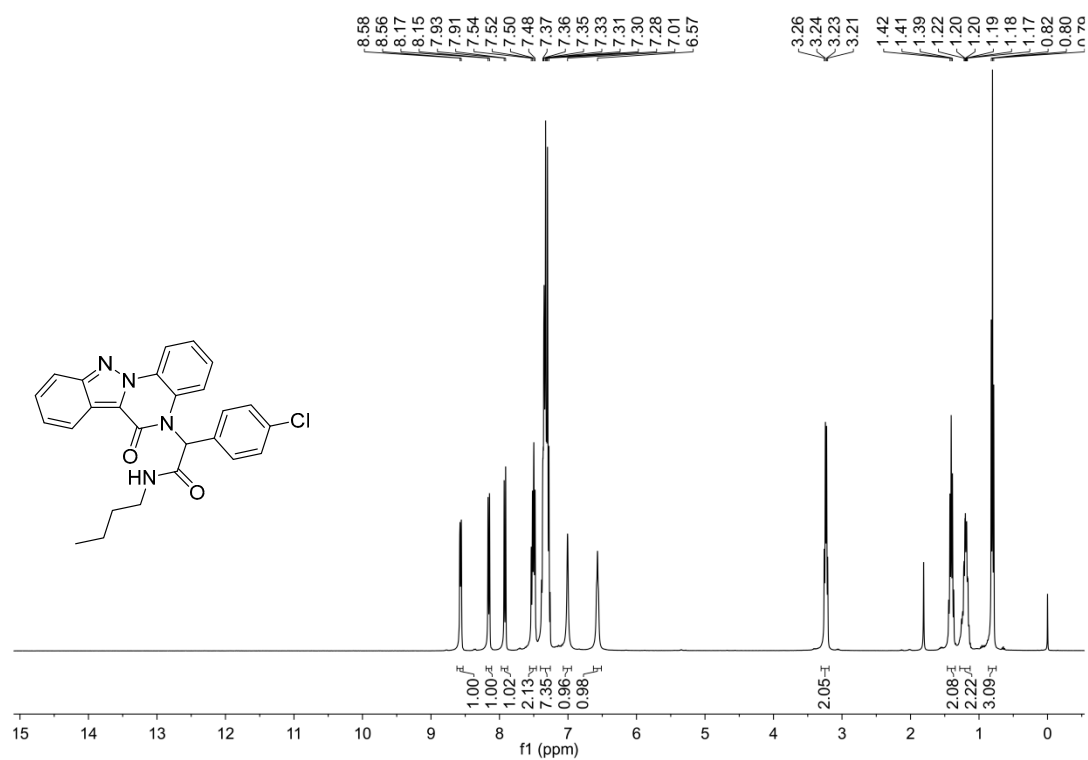

$^{13}\text{C}$  NMR spectrum of **6l** (101 MHz,  $\text{CDCl}_3$ )

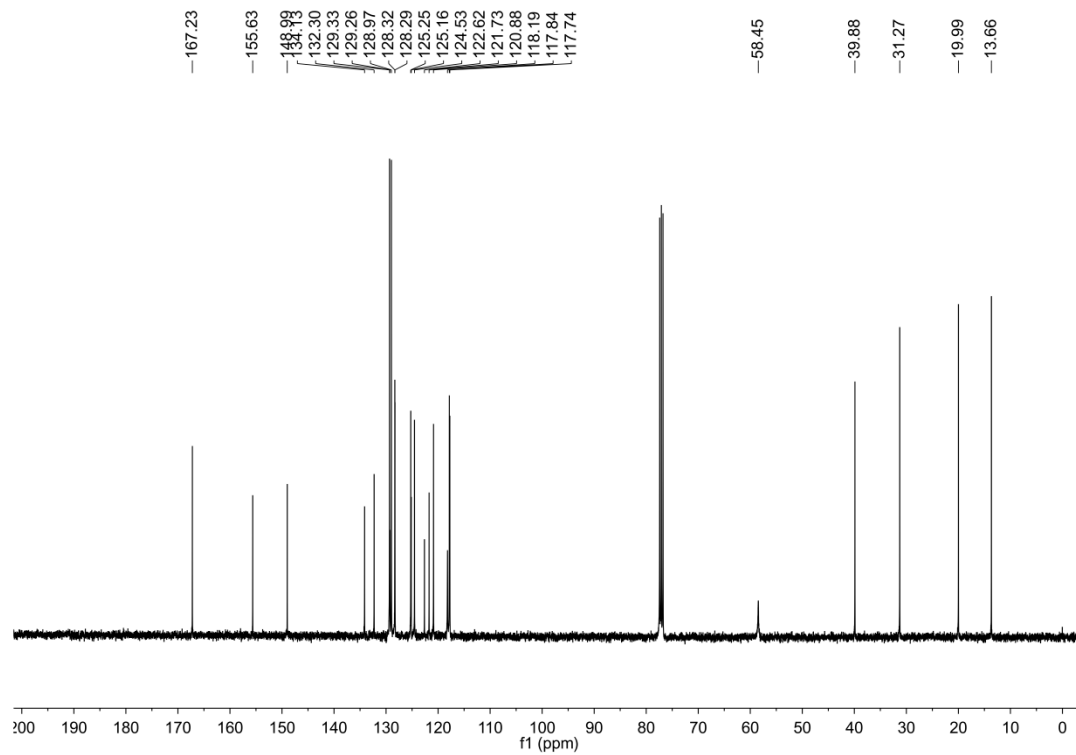

<sup>1</sup>H NMR spectrum of **6m** (400 MHz, CDCl<sub>3</sub>)

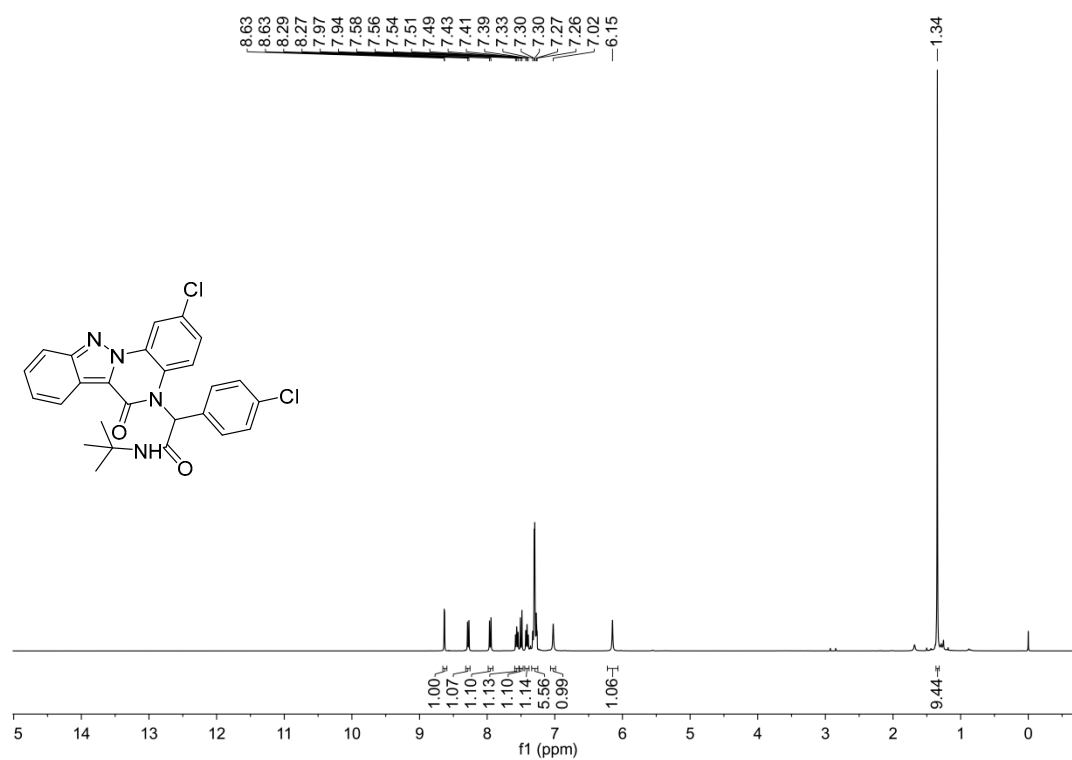

<sup>13</sup>C NMR spectrum of **6m** (101 MHz, CDCl<sub>3</sub>)

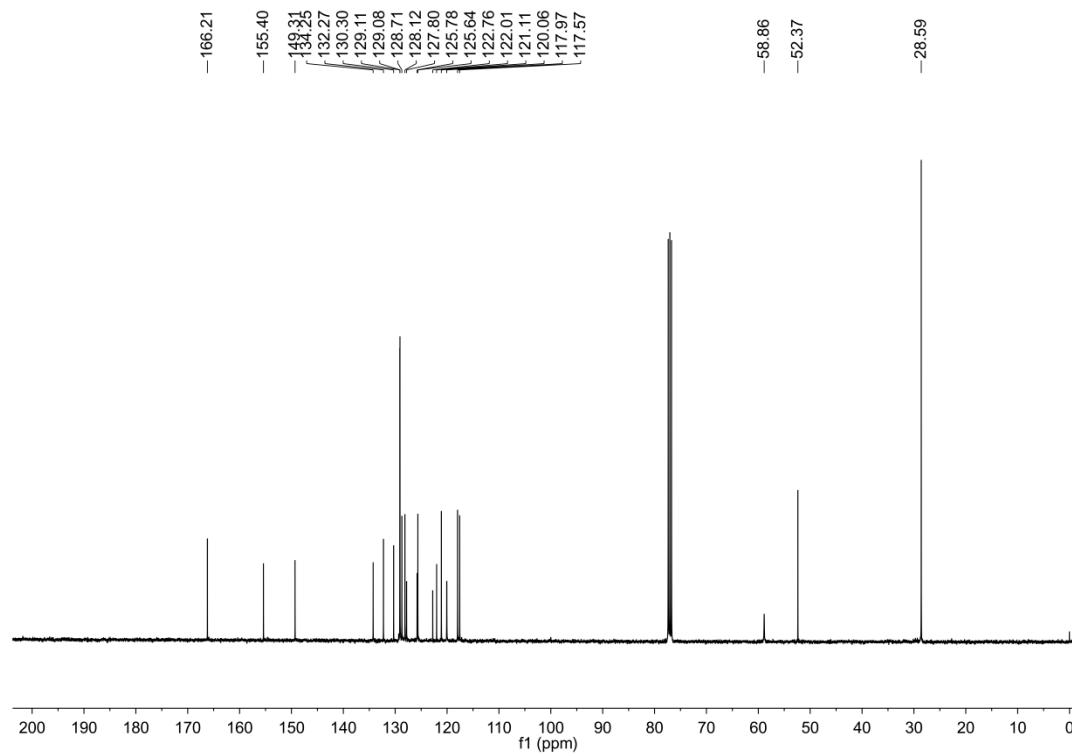

$^1\text{H}$  NMR spectrum of **6n** (400 MHz,  $\text{CDCl}_3$ )

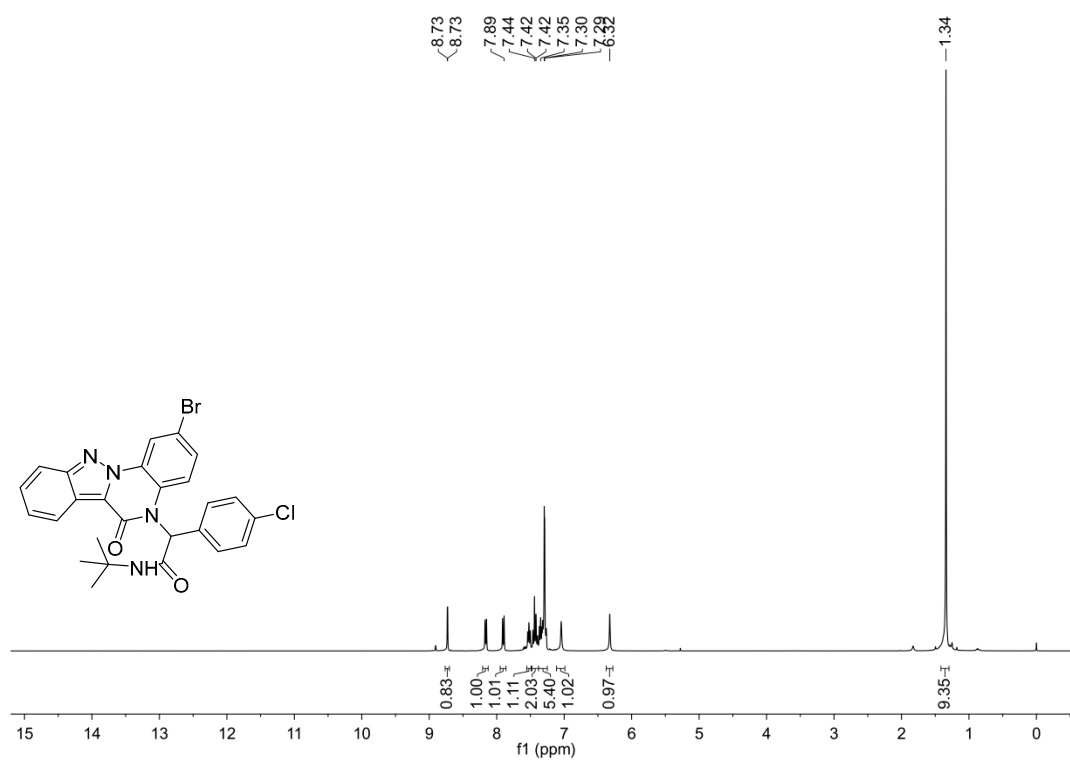

$^{13}\text{C}$  NMR spectrum of **6n** (101 MHz,  $\text{CDCl}_3$ )

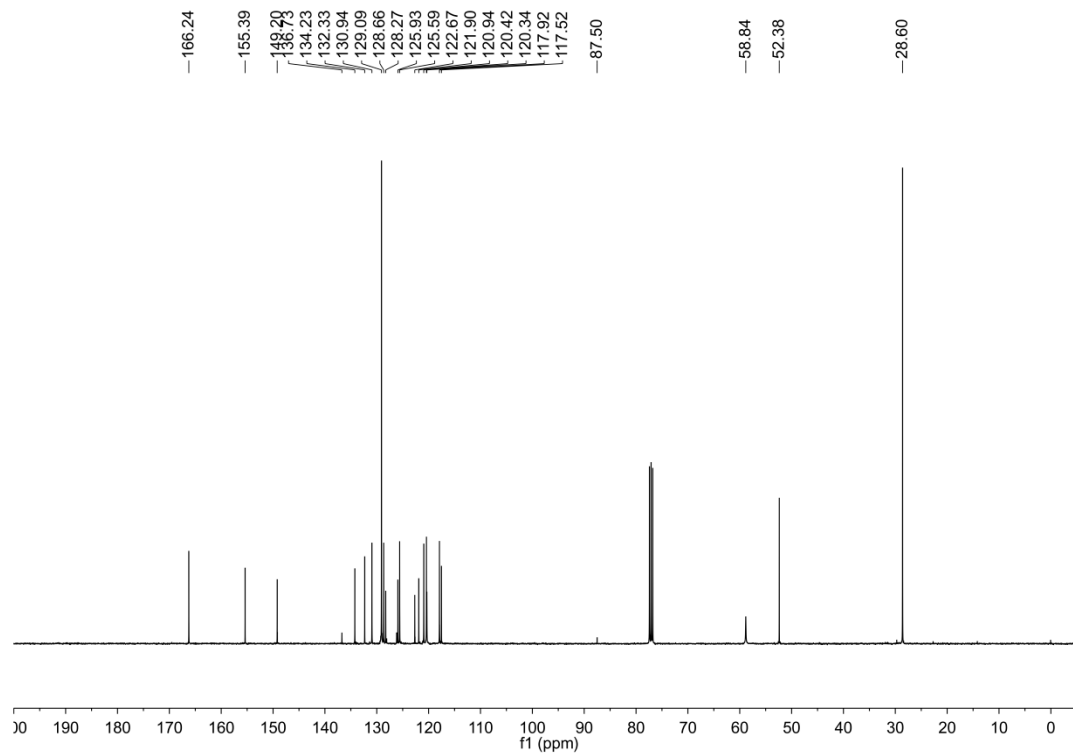



$^1\text{H}$  NMR spectrum of **6o** (400 MHz,  $\text{CDCl}_3$ )

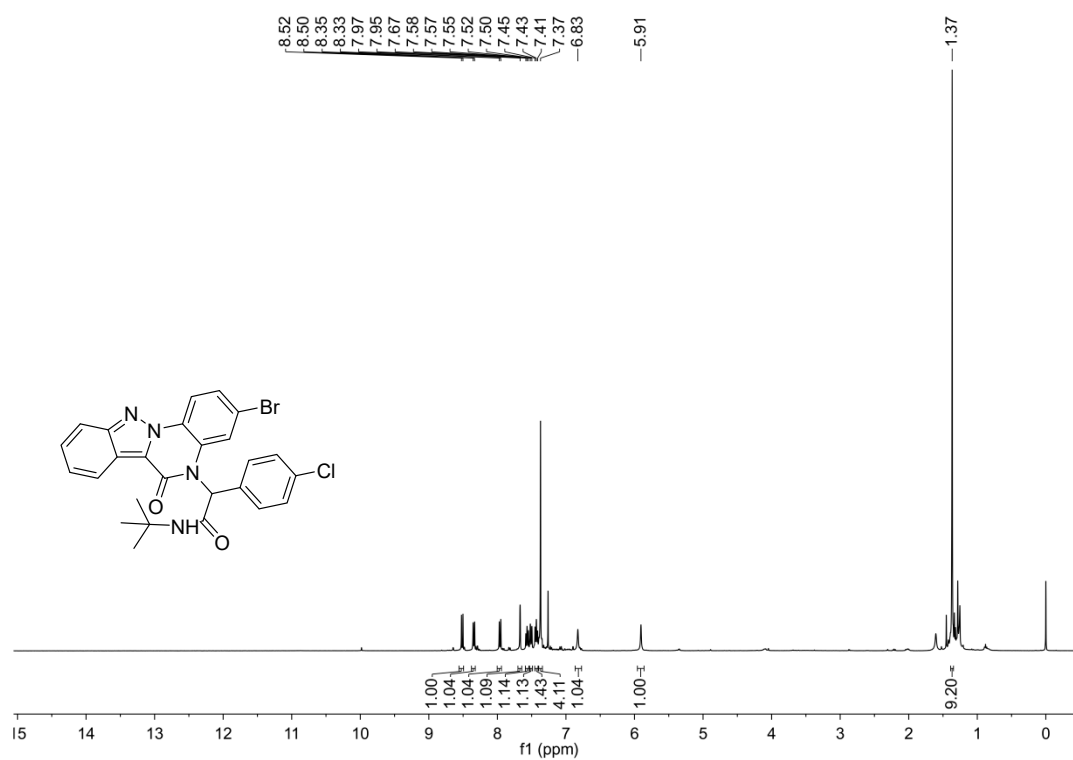

$^{13}\text{C}$  NMR spectrum of **6o** (101 MHz,  $\text{CDCl}_3$ )

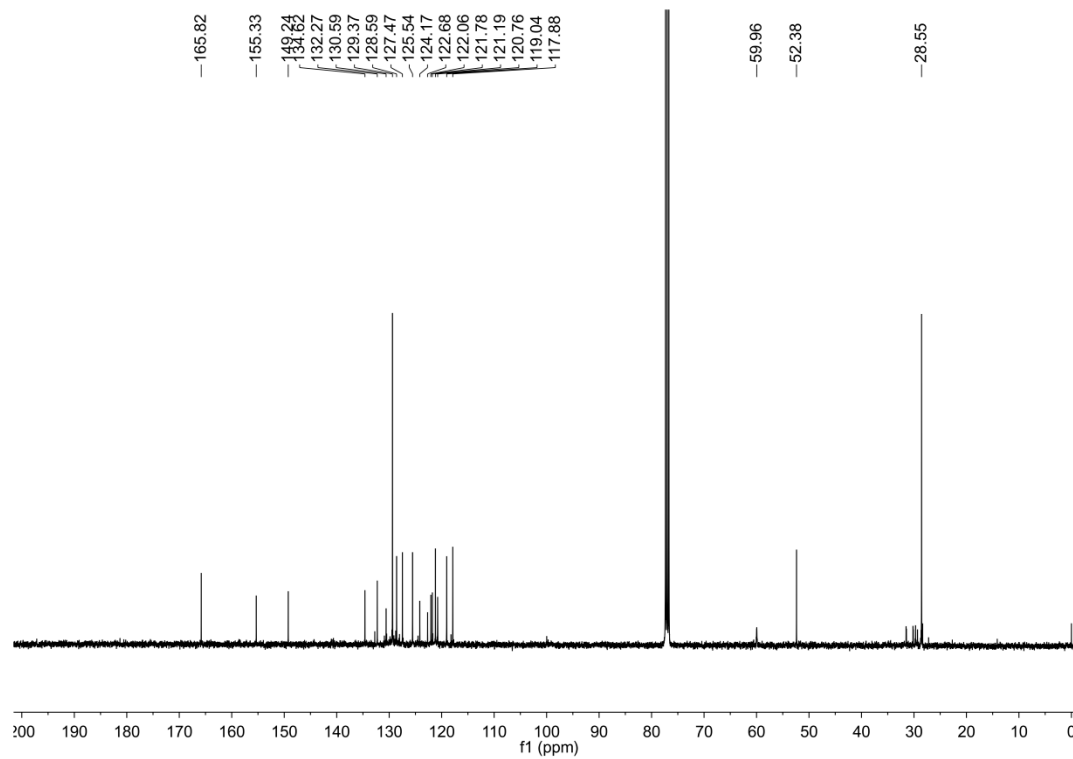

$^1\text{H}$  NMR spectrum of **6p** (400 MHz,  $\text{CDCl}_3$ )

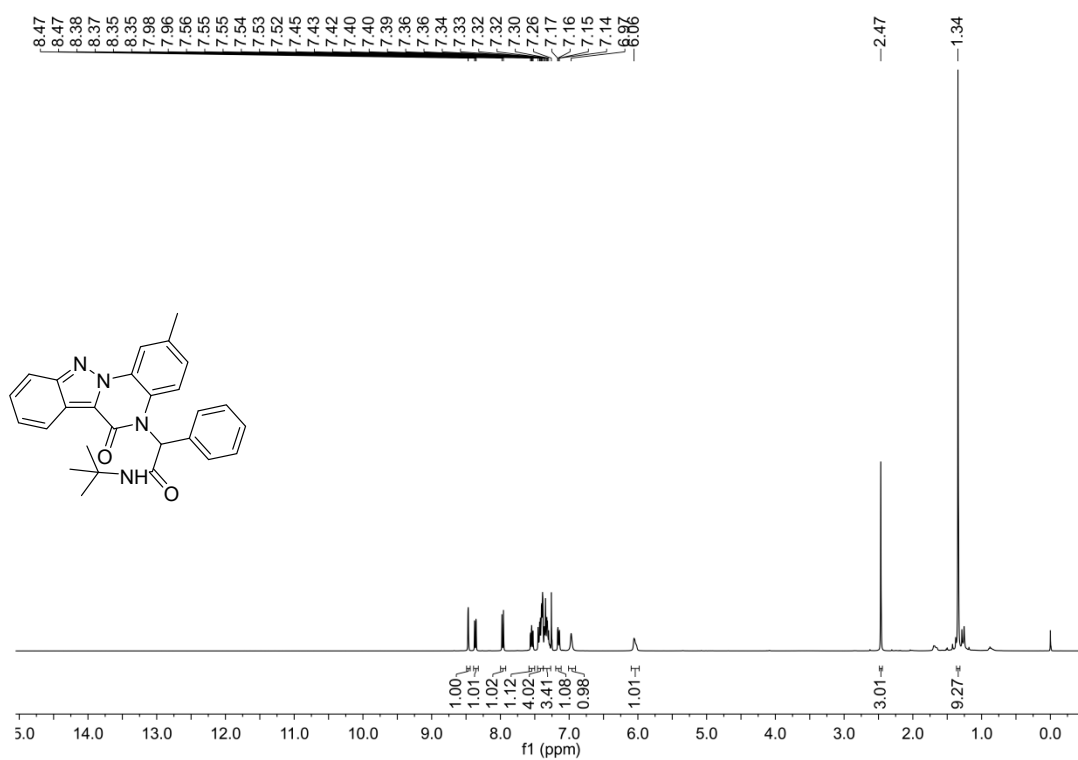

$^{13}\text{C}$  NMR spectrum of **6p** (101 MHz,  $\text{CDCl}_3$ )

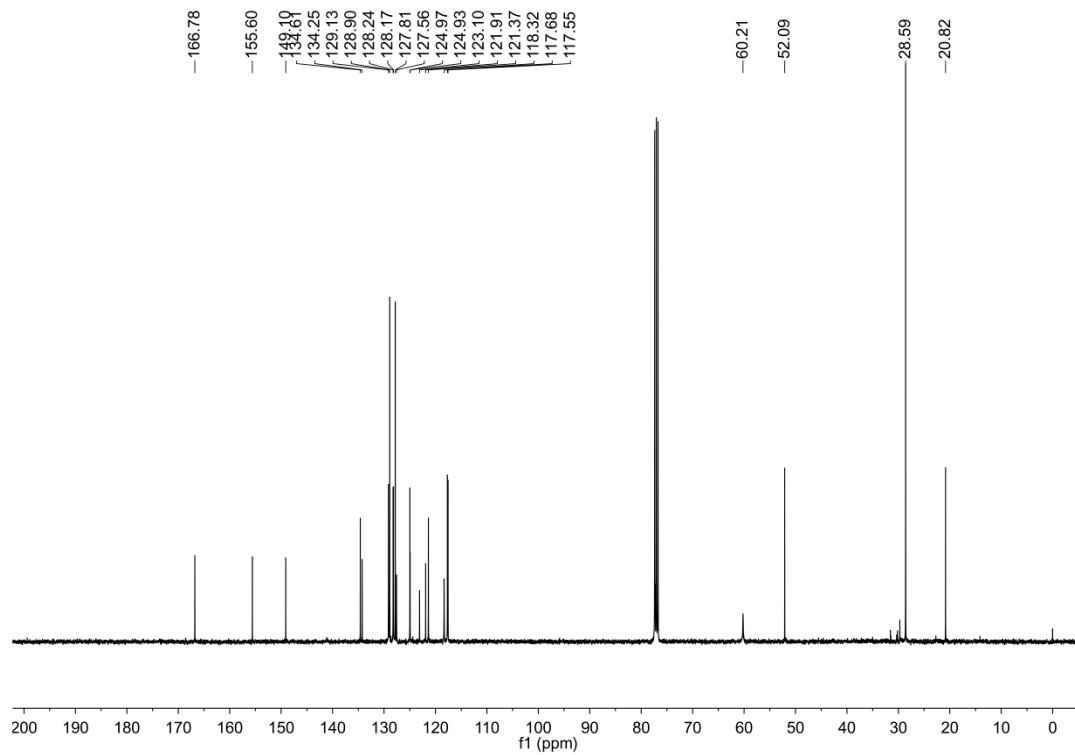

<sup>1</sup>H NMR spectrum of **6q** (400 MHz, CDCl<sub>3</sub>)

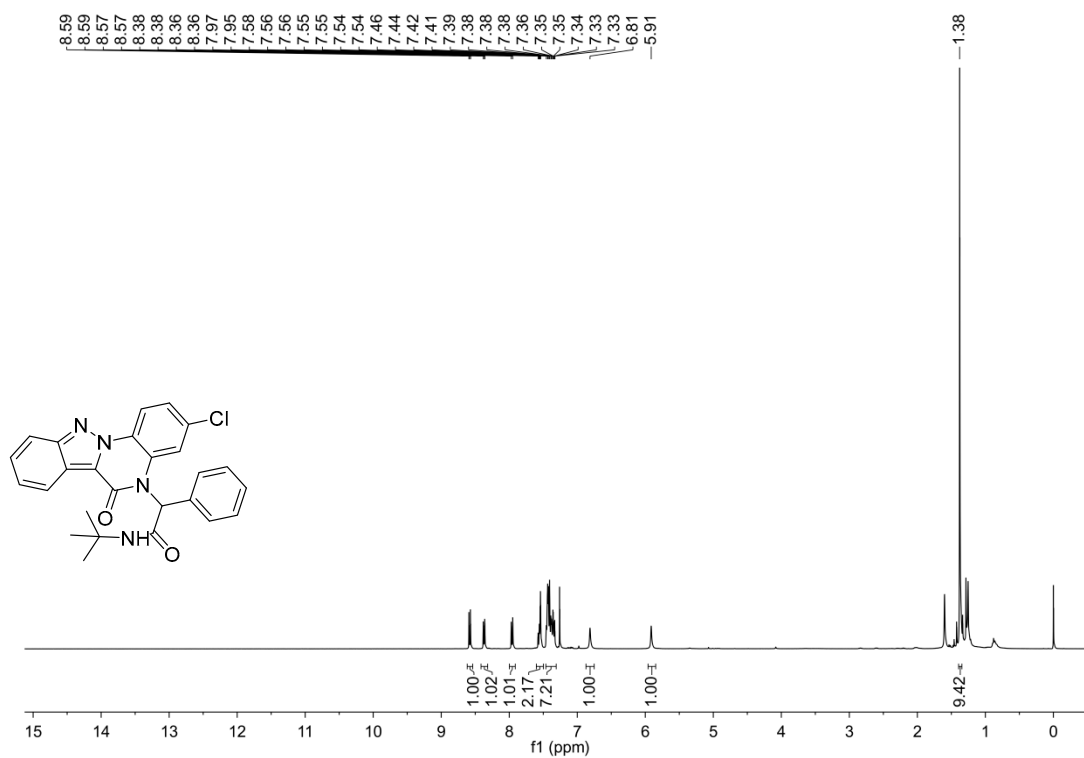

<sup>13</sup>C NMR spectrum of **6q** (101 MHz, CDCl<sub>3</sub>)

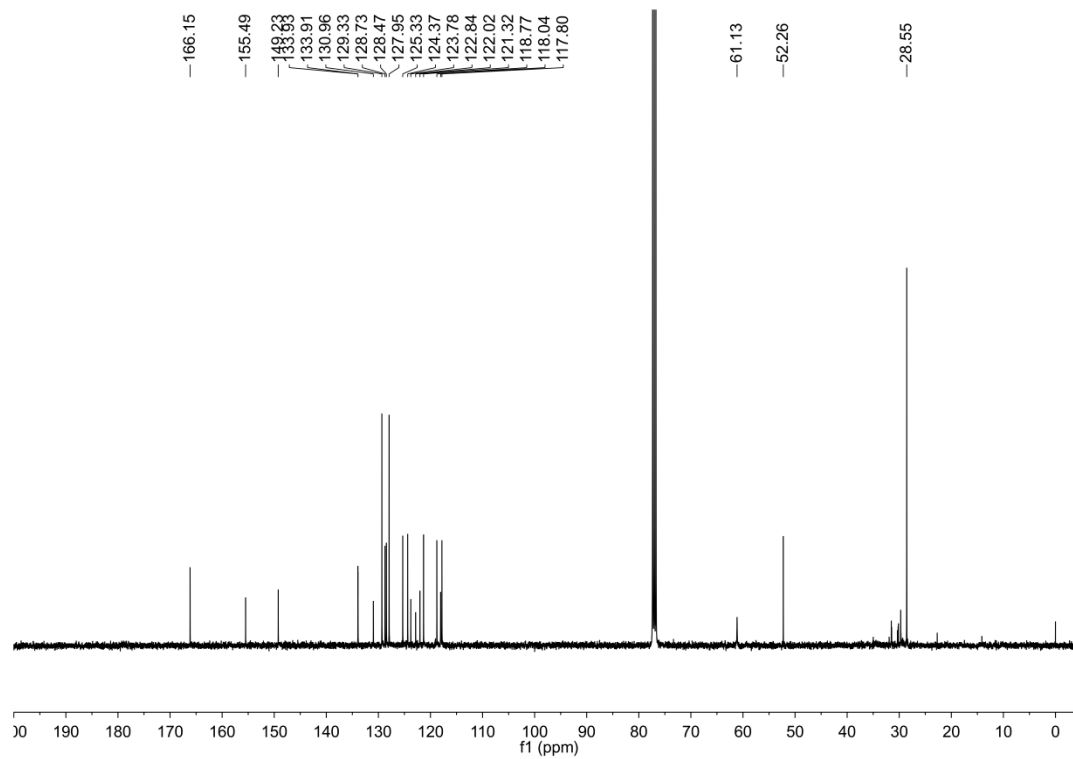

$^1\text{H}$  NMR spectrum of **6r** (400 MHz,  $\text{CDCl}_3$ )

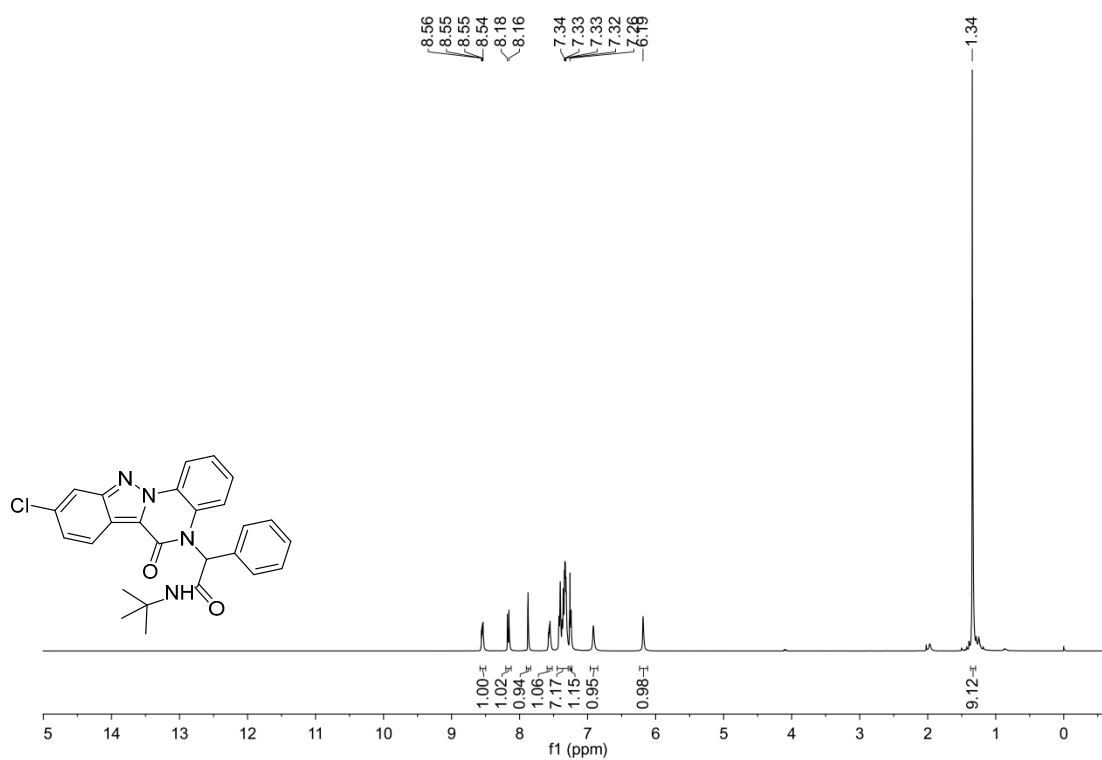

$^{13}\text{C}$  NMR spectrum of **6r** (101 MHz,  $\text{CDCl}_3$ )

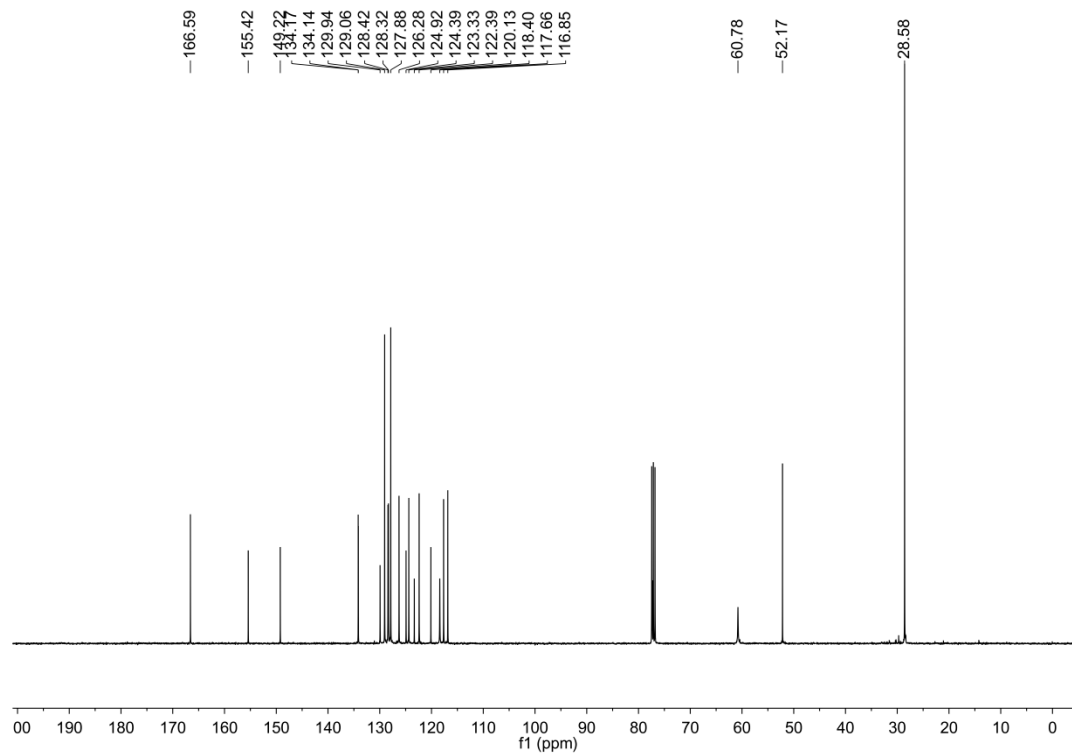

$^1\text{H}$  NMR spectrum of **6s** (400 MHz,  $\text{CDCl}_3$ )

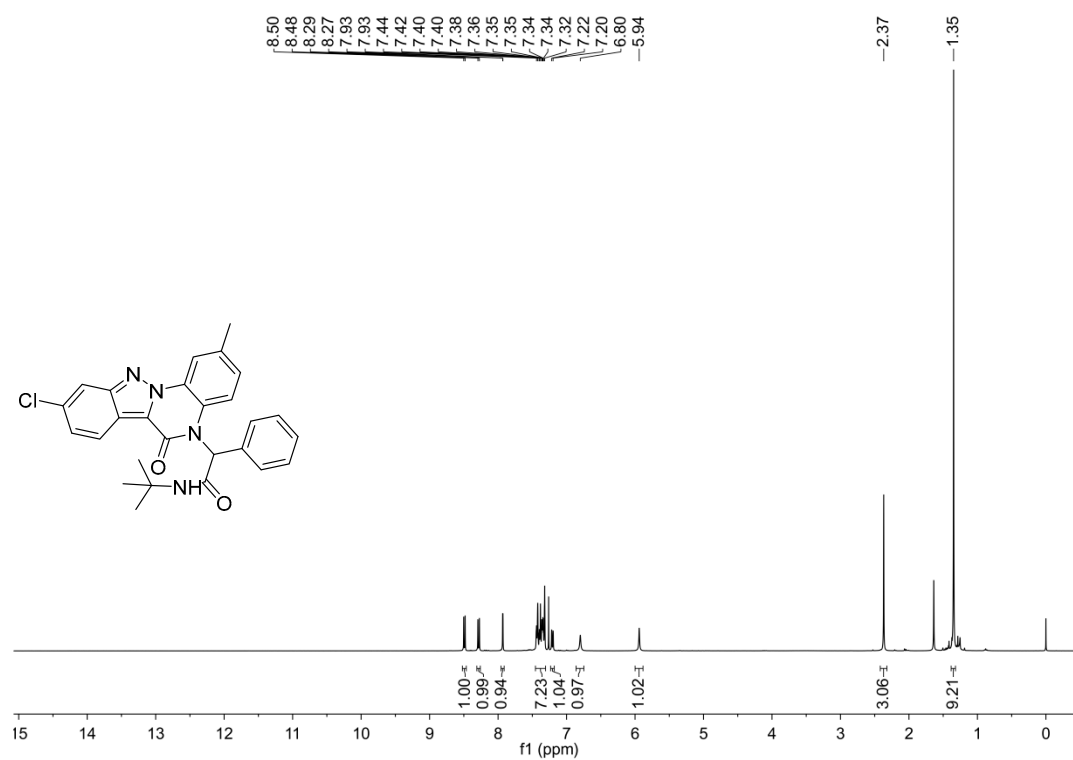

$^{13}\text{C}$  NMR spectrum of **6s** (101 MHz,  $\text{CDCl}_3$ )

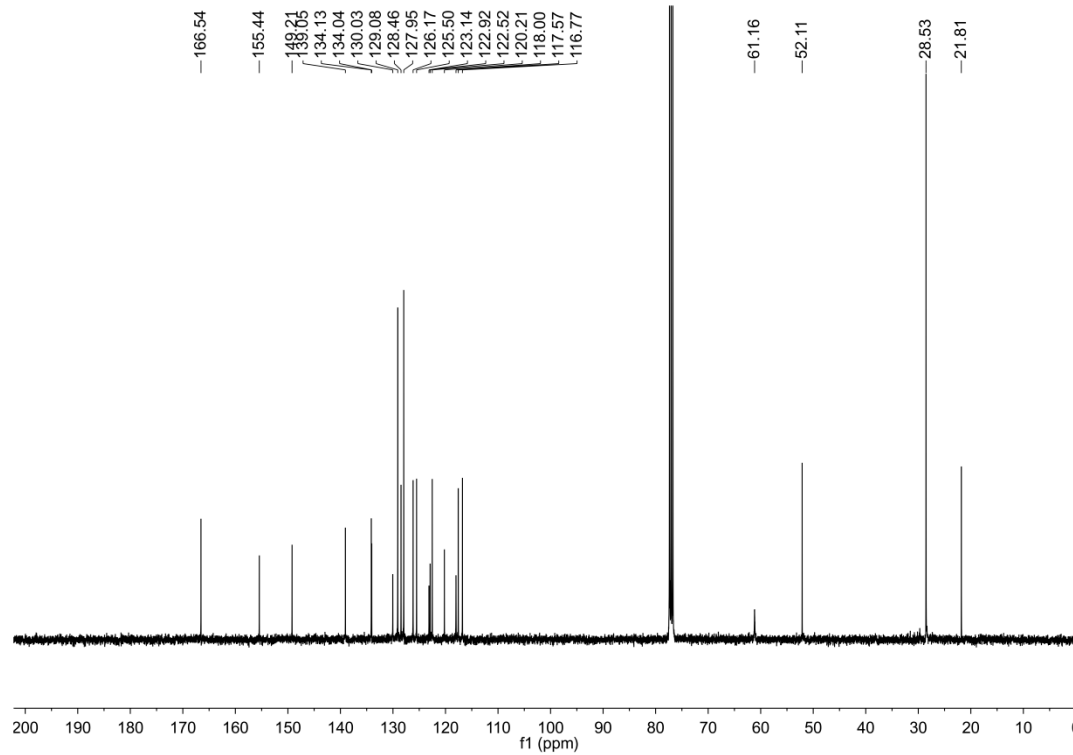

$^1\text{H}$  NMR spectrum of **6t** (400 MHz,  $\text{CDCl}_3$ )

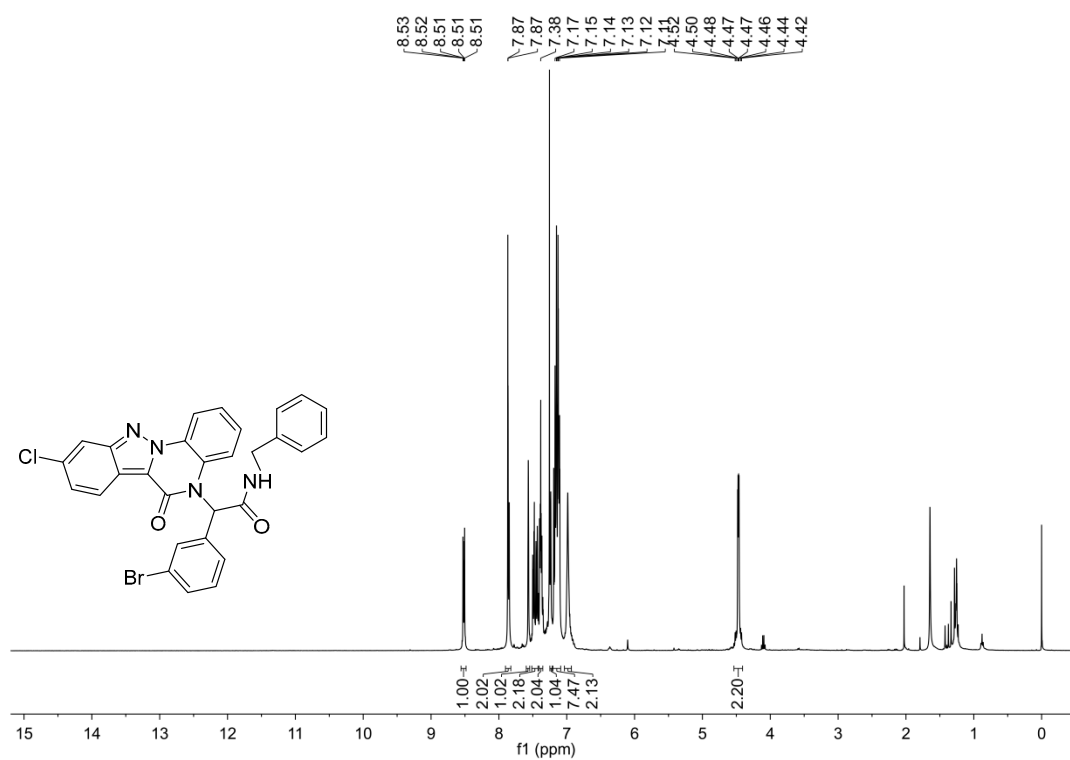

$^{13}\text{C}$  NMR spectrum of **6t** (101 MHz,  $\text{CDCl}_3$ )

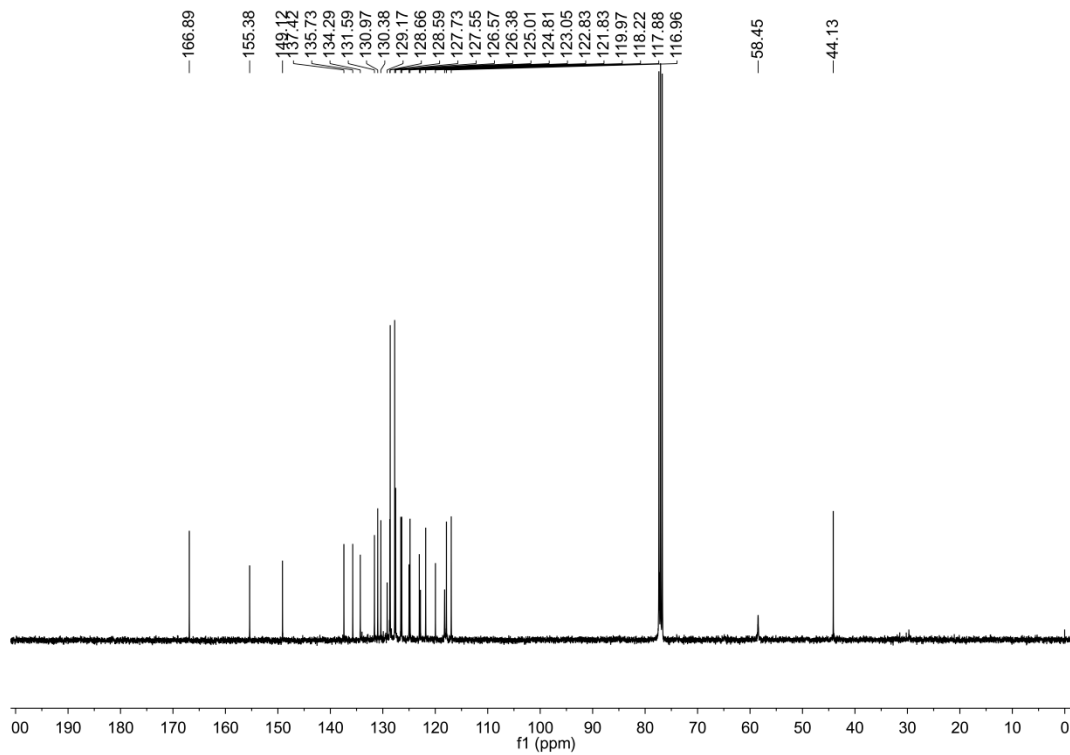

<sup>1</sup>H NMR spectrum of **6u** (400 MHz, CDCl<sub>3</sub>)

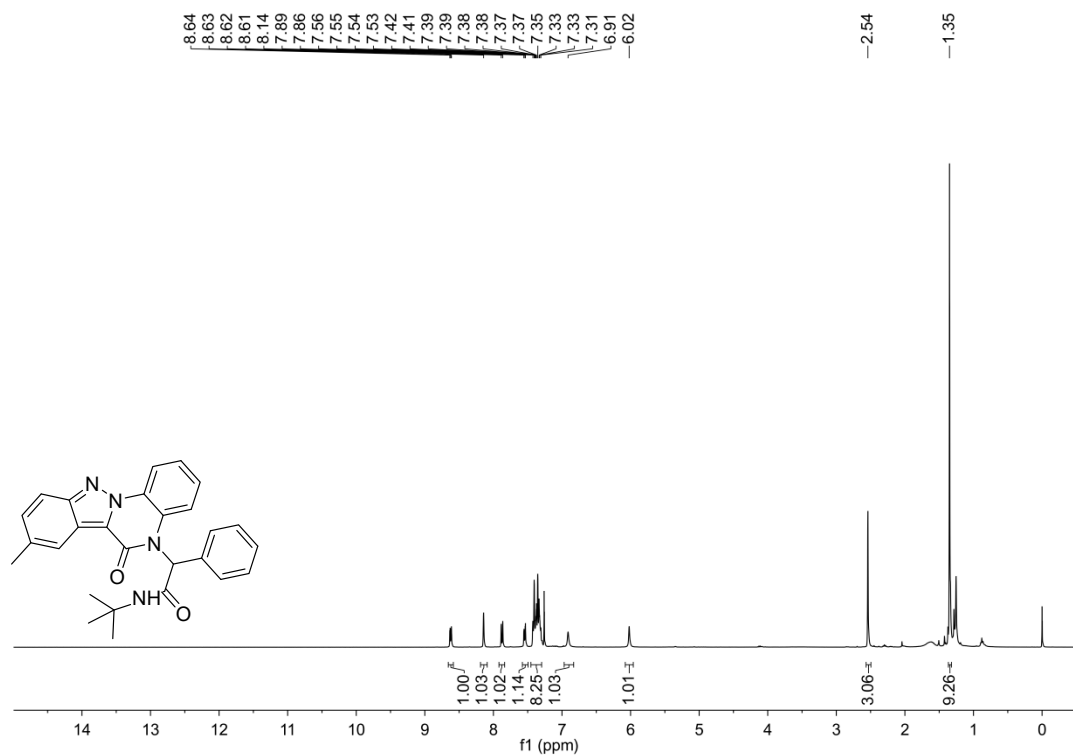

<sup>13</sup>C NMR spectrum of **6u** (101 MHz, CDCl<sub>3</sub>)

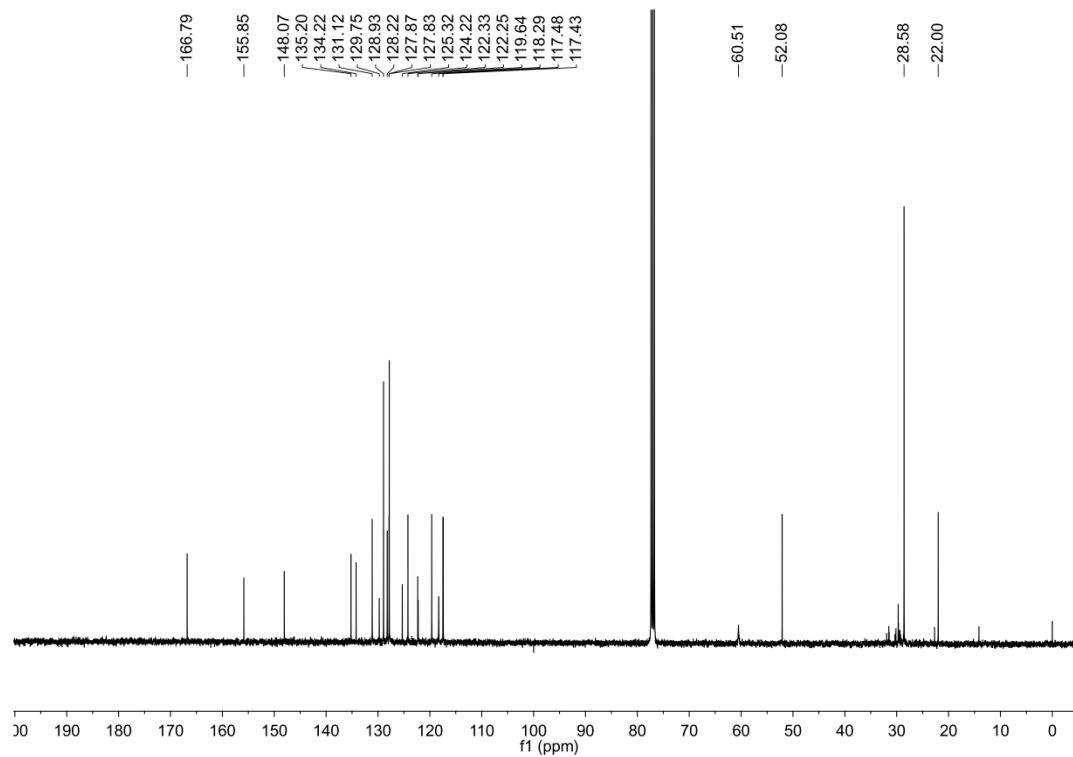

<sup>1</sup>H NMR spectrum of **6v** (400 MHz, DMSO-*d*<sub>6</sub>)

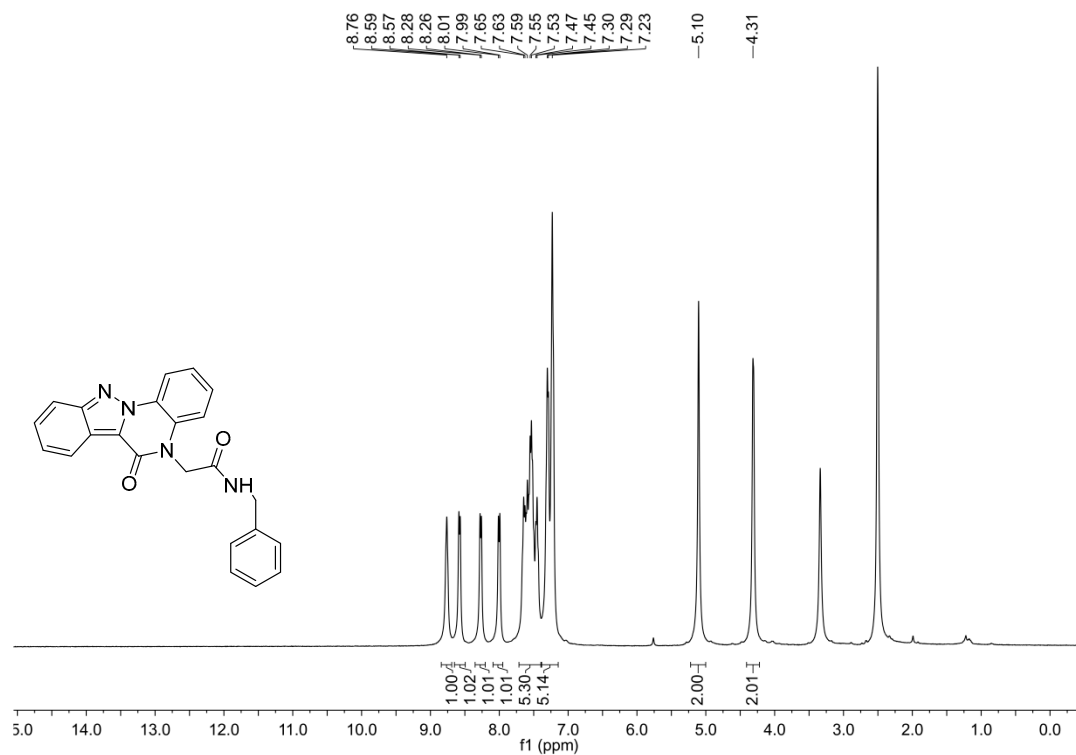

<sup>13</sup>C NMR spectrum of **6v** (101 MHz, DMSO-*d*<sub>6</sub>)

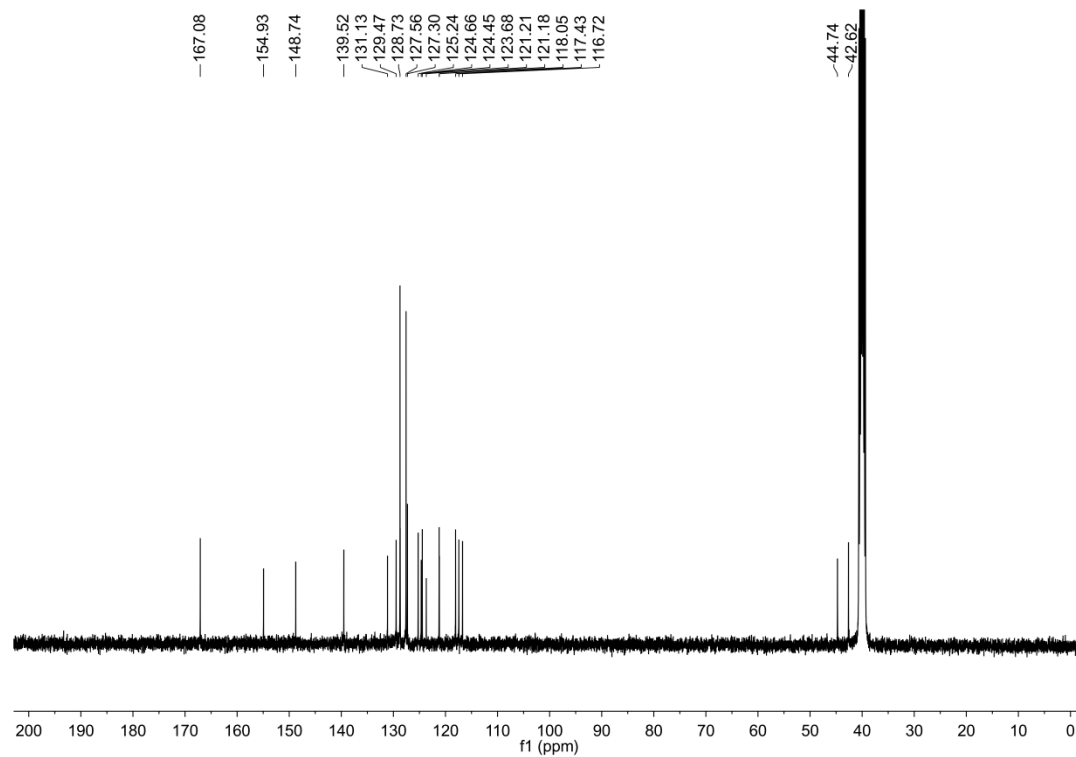

Supplement: s1 [file s1]
